# Supplementary material for: Embryonic stem cell-specific microRNAs contribute to pluripotency by inhibiting regulators of multiple differentiation pathways
Source: PubMed Central journal article supplement — Nucleic Acids Res. 2014 Jul 16;42(14):9313–26. doi: 10.1093/nar/gku544 (PMC4132708; doi:10.1093/nar/gku544), 2014-07-16
Supplement: supp_gku544_nar-01400-x-2014-File002.pdf [file supp_gku544_nar-01400-x-2014-File002.pdf]

## Supplementary Information

Andreas J. Gruber<sup>1</sup>, William A. Grandy<sup>1</sup>, Piotr J. Balwierz<sup>1</sup>, Yoana A. Dimitrova<sup>1</sup>, Mikhail Pachkov<sup>1</sup>, Constance Ciaudo<sup>2</sup>, Erik van Nimwegen<sup>1</sup> & Mihaela Zavolan<sup>1\*</sup>

**1 Biozentrum, University of Basel, Klingelberstrasse 50-70, CH-4056 Basel, Switzerland**

**2 ETH Zürich, Otto-Stern-Weg 7, CH-8093 Zürich, Switzerland**

\* **E-mail: Corresponding mihaela.zavolan@unibas.ch**

| Publication                 | GEO Id   | First Condition      | Second Condition                                 |
|-----------------------------|----------|----------------------|--------------------------------------------------|
| Hanina <i>et al.</i> [1]    | GSE20048 | Dicer <sup>-/-</sup> | miR-294 transfected Dicer <sup>-/-</sup>         |
| Melton <i>et al.</i> [2]    | GSE18840 | Dgcr8 <sup>-/-</sup> | miR-294 transfected Dgcr8 <sup>-/-</sup>         |
| Sinkkonen <i>et al.</i> [3] | GSE8503  | Dicer <sup>-/-</sup> | miR-290 cluster transfected Dicer <sup>-/-</sup> |
| Sinkkonen <i>et al.</i> [3] | GSE7141  | Dicer <sup>-/-</sup> | Dicer <sup>+/-</sup> (miRNA expressing ESCs)     |
| Zheng <i>et al.</i> [4]     | GSE30012 | Dicer <sup>-/-</sup> | Dicer <sup>+/-</sup> (miRNA expressing ESCs)     |

**Table 1. Experimental data sets available for the analysis of miR-290-295 cluster function in embryonic stem cells** - Each data set consists in measurements of mRNA expression in a first condition (an ES cell line deficient in mature miRNAs) and a second condition (the respective cell line transfected with specific miRNAs or the cell line expressing the full complement of miRNAs). Accession numbers of the data sets in the Gene Expression Omnibus database [5] are specified.

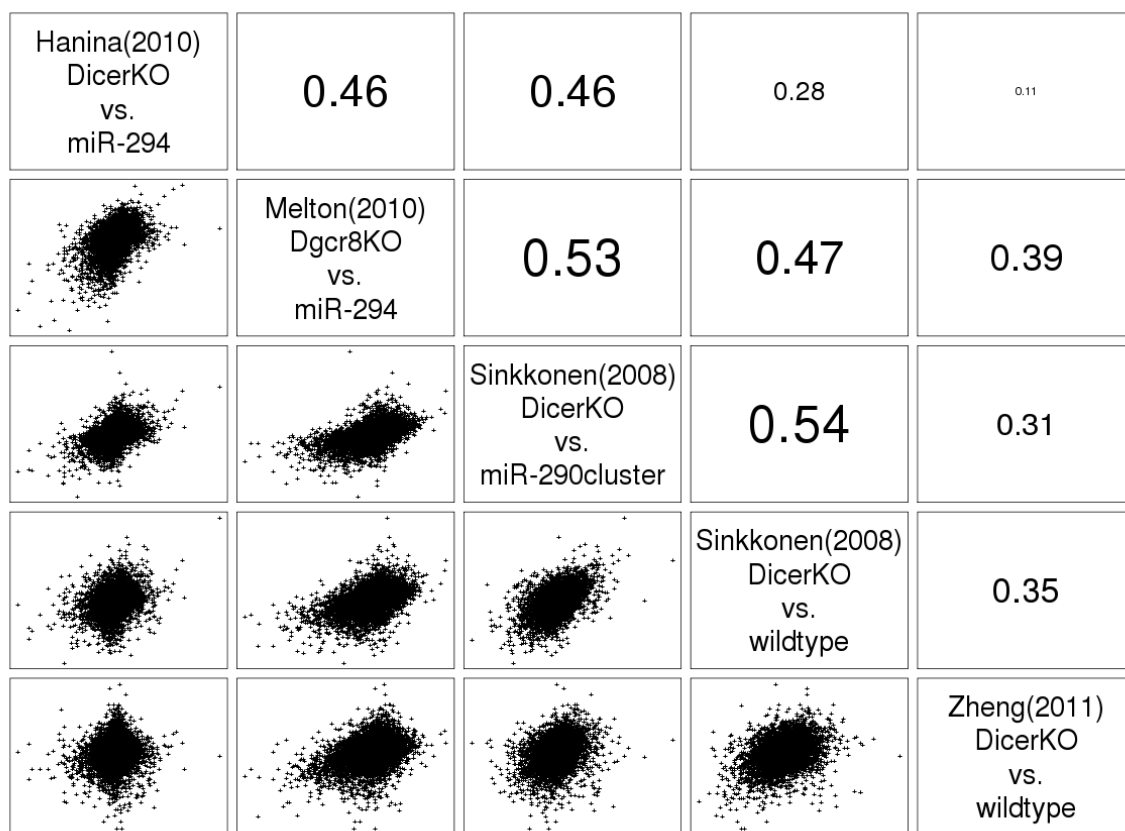

**Figure 1. Summary of the relationship between all the data sets that we considered for our study** - Scatter plot / correlation coefficient matrix: The identities of the data sets are indicated on the diagonal. Below the diagonal are scatter plots of  $\log_2$  - gene expression fold changes in any pair of experiments. Above the diagonal are the corresponding Pearson correlation coefficients.

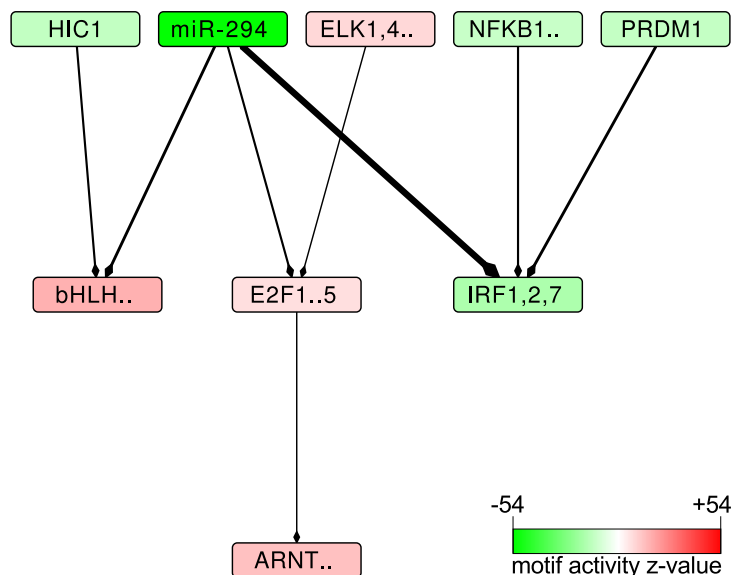

**Figure 2.** The transcriptional network inferred through a combined MARA analysis of all five experimental data sets (Supplementary Table 1) to be affected by the miRNAs of the AAGUGCU seed family (represented by miR-294) - A directed edge was drawn from a motif *A* to a motif *B* if *A* was consistently (across data sets) predicted to regulate a transcription factor *b* whose sequence specificity is represented by motif *B*. The thickness of the edge is proportional to the product of the probabilities that *A* targets *b* across data sets. For the clarity of the figure, only edges with a target probability product  $> 0.135$  and only motifs with absolute *z*-values  $> 5$  are shown. The intensity of the color of a box representing a motif is proportional to the significance of the motif (the corresponding *z*-values can be found in Suppl. Table 5). Red indicates an increase and green a decrease in activity, corresponding to an increased and decreased, respectively, expression of the targets of the motif in the presence of the miRNAs. The full motif names as well as the corresponding transcription factors are listed in Supplementary Table 7.

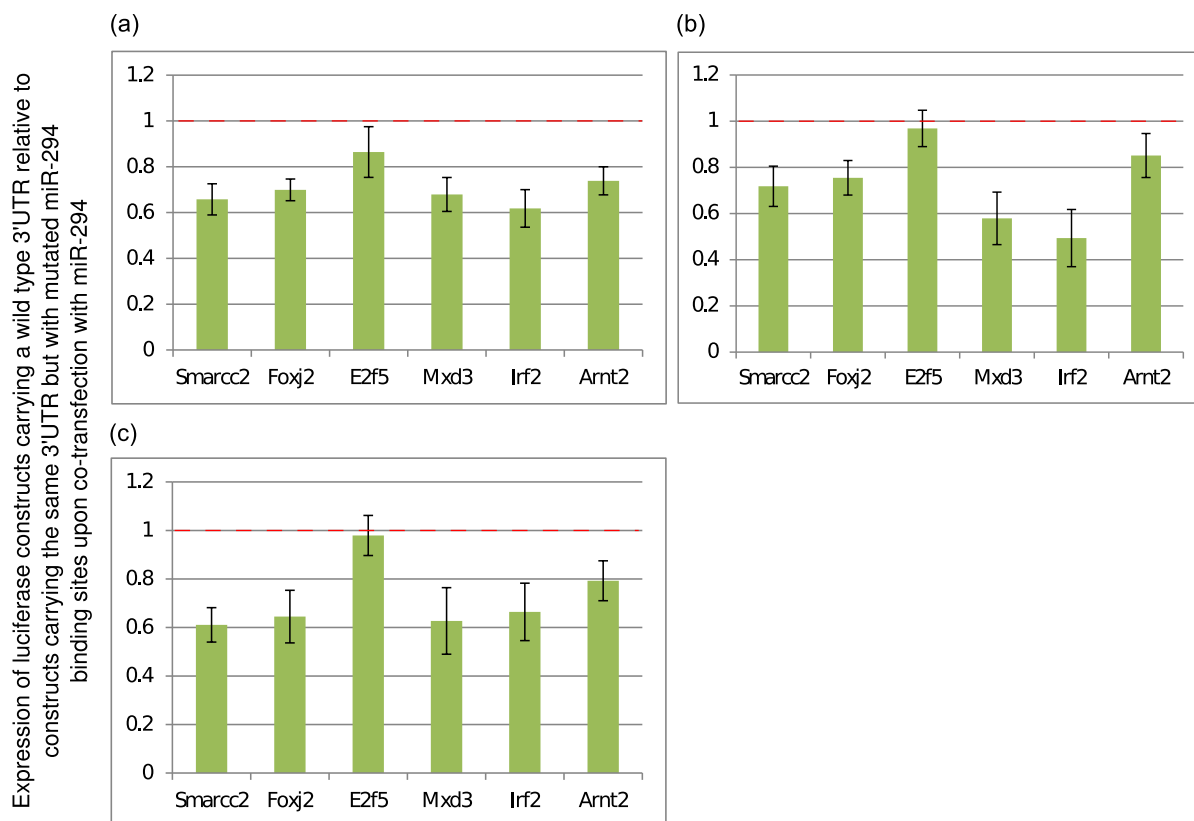

**Figure 3. Results of luciferase assays** - (a), (b) and (c) show the results of three independent experiments in which the effect that the miR-294 mimic has on the expression of constructs containing the 3' UTRs of predicted miR-294 targets downstream of the coding region of the Renilla luciferase relative to a control siRNA (si-Ctrl) was measured. The Firefly luciferase was used as a transfection control. Each experiment consisted in three technical replicates. For each of the wildtype and mutant constructs we calculated the mean ( $\mu$ ) and the standard deviation ( $\sigma$ ) of the ratios of Renilla-to-Firefly expression ratio in all pairs of miR-294 vs. si-Ctrl transfections that were done in an individual experiment. We thus obtained, for each target gene, estimates of the mean and standard deviation of the response of the wild type 3'UTR ( $\mu_{wt}$ ,  $\sigma_{wt}$ ) and the mutated 3'UTR ( $\mu_{mut}$ ,  $\sigma_{mut}$ ). Finally, we calculated the ratio of these means ( $r_{wt/mut} = \frac{\mu_{wt}}{\mu_{mut}}$ ) and the corresponding standard deviation  $\sigma_{wt/mut} = r_{wt/mut} * \sqrt{(\sigma_{wt}/\mu_{wt})^2 + (\sigma_{mut}/\mu_{mut})^2}$ . The estimates obtained from the three independent experiments are shown in panels (a) - (c) of the figure.

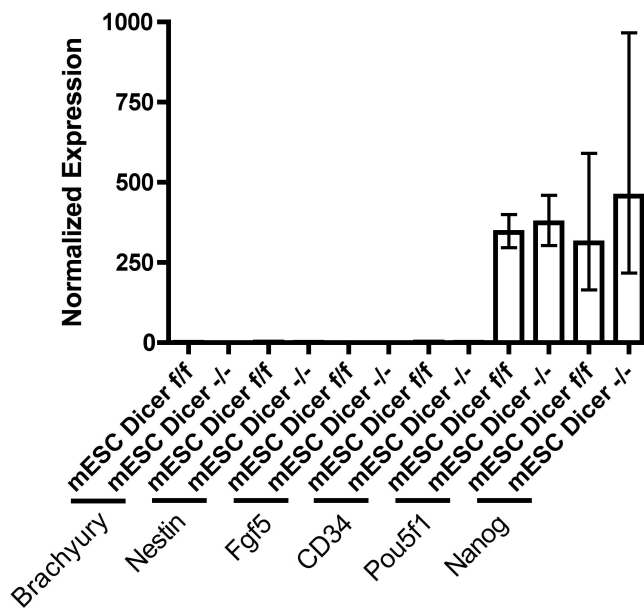

**Figure 4. Expression of markers that are indicative of the pluripotent and differentiation state of mESCs** - Total RNA was extracted from the  $DCR^{flox/flox}$  and  $DCR^{-/-}$  mESCs as described in the methods section. qRT-PCR reactions were run in triplicate using the following primer pairs as described in [6]. Brachyury, Nestin, Fgf5, and CD34 all serve as markers of differentiation and were all very lowly expressed in both stem cell lines, whereas the pluripotency markers Pou5f1 (Oct4) and Nanog were very highly expressed in comparison ( $\pm$ SEM; n=3). Both  $DCR^{flox/flox}$  and  $DCR^{-/-}$  cells express similar amounts of each marker showing that  $DCR^{-/-}$  are not differentiated.

| gene.name     | entrez.id | target.probability |
|---------------|-----------|--------------------|
| Rnf38         | 73469     | 0.34               |
| Dazap2        | 23994     | 0.72               |
| Zfp148        | 22661     | 0.78               |
| Phactr4       | 100169    | 0.45               |
| Zbtb6         | 241322    | 0.54               |
| Mef2a         | 17258     | 0.71               |
| 1810013L24Rik | 69053     | 0.60               |
| Mecp2         | 17257     | 0.17               |
| Spop          | 20747     | 0.26               |
| Tmem64        | 100201    | 0.40               |
| Tnfaip1       | 21927     | 0.72               |
| Lclat1        | 225010    | 0.80               |
| Ostm1         | 14628     | 0.75               |
| Cxadr         | 13052     | 0.76               |
| Muted         | 17828     | 0.11               |
| Frmd4a        | 209630    | 0.82               |
| Foxj3         | 230700    | 0.80               |
| Lcorl         | 209707    | 0.47               |
| Mmp23         | 26561     | 0.15               |
| Gtdc1         | 227835    | 0.61               |
| Ube2j1        | 56228     | 0.58               |
| Entpd7        | 93685     | 0.05               |
| BC013529      | 215751    | 0.69               |
| Zfp46         | 22704     | 0.61               |
| Irf9          | 16391     | 0.82               |
| Fyco1         | 17281     | 0.40               |
| Blcap         | 53619     | 0.67               |
| Btg1          | 12226     | 0.82               |
| Dcaf7         | 71833     | 0.63               |
| Arhgef18      | 102098    | 0.82               |
| Pip4k2a       | 18718     | 0.36               |
| Pik3r3        | 18710     | 0.43               |
| Ddhd1         | 114874    | 0.72               |
| Aebp2         | 11569     | 0.87               |
| Wee1          | 22390     | 0.70               |
| Wfs1          | 22393     | 0.70               |
| Ube2w         | 66799     | 0.67               |
| Nr2c1         | 22025     | 0.82               |
| Irf2bp2       | 270110    | 0.90               |
| Dcaf6         | 74106     | 0.13               |
| Chn2          | 69993     | 0.30               |
| Rtn1          | 104001    | 0.74               |
| Dgke          | 56077     | 0.77               |
| Dock2         | 94176     | 0.47               |
| Trps1         | 83925     | 0.79               |
| P2rx4         | 18438     | 0.61               |
| Crk           | 12928     | 0.71               |
| Zbtb41        | 226470    | 0.96               |

|               |        |      |
|---------------|--------|------|
| March8        | 71779  | 0.86 |
| Zfp367        | 238673 | 0.56 |
| Psd3          | 234353 | 0.47 |
| Wdr1          | 22388  | 0.74 |
| Zc3h12c       | 244871 | 0.71 |
| Polk          | 27015  | 0.42 |
| Msl1          | 74026  | 0.61 |
| Kpna2         | 16647  | 0.40 |
| Rb1cc1        | 12421  | 0.41 |
| Ncoa7         | 211329 | 0.62 |
| Ano6          | 105722 | 0.76 |
| Sipa1l3       | 74206  | 0.67 |
| Mbd2          | 17191  | 0.11 |
| Snx8          | 231834 | 0.86 |
| Tnrc6b        | 213988 | 0.57 |
| Gnb5          | 14697  | 0.39 |
| Fndc3a        | 319448 | 0.66 |
| Kirrel        | 170643 | 0.83 |
| Znrf3         | 407821 | 0.79 |
| Ccnd2         | 12444  | 0.85 |
| Rab22a        | 19334  | 0.88 |
| Ptp4a1        | 19243  | 0.10 |
| Tceb3         | 27224  | 0.61 |
| Irf2          | 16363  | 0.39 |
| Akt1          | 11651  | 0.31 |
| Mtf1          | 17764  | 0.93 |
| Zbtb7a        | 16969  | 0.91 |
| Mtmr3         | 74302  | 0.75 |
| Ankrd32       | 105377 | 0.11 |
| F3            | 14066  | 0.71 |
| Plekha3       | 83435  | 0.66 |
| BC037034      | 231807 | 0.64 |
| Agfg2         | 231801 | 0.81 |
| Ccdc88a       | 108686 | 0.62 |
| Tcfap4        | 83383  | 0.64 |
| Rictor        | 78757  | 0.21 |
| Elavl2        | 15569  | 0.60 |
| Ankrd57       | 268301 | 0.15 |
| Rasal2        | 226525 | 0.63 |
| Zfp518a       | 72672  | 0.39 |
| Lats2         | 50523  | 0.54 |
| Epc2          | 227867 | 0.06 |
| Zbtb44        | 235132 | 0.86 |
| Hs2st1        | 23908  | 0.56 |
| Cnot6l        | 231464 | 0.28 |
| Myo9a         | 270163 | 0.80 |
| Ssx2ip        | 99167  | 0.79 |
| 8430427H17Rik | 329540 | 0.74 |
| Abca1         | 11303  | 0.85 |

|               |        |      |
|---------------|--------|------|
| Calm1         | 12313  | 0.79 |
| Plagl2        | 54711  | 0.94 |
| Tbcel         | 272589 | 0.36 |
| Plekhm1       | 353047 | 0.81 |
| 2700081O15Rik | 108899 | 0.56 |
| Arhgef17      | 207212 | 0.81 |
| AI848100      | 226551 | 0.83 |
| Prdm4         | 72843  | 0.68 |
| Lin52         | 217708 | 0.73 |
| Pou6f1        | 19009  | 0.84 |
| Pgbd5         | 209966 | 0.79 |
| Ikzf2         | 22779  | 0.98 |
| Apbb2         | 11787  | 0.09 |
| Mcl1          | 17210  | 0.80 |
| Zfp800        | 627049 | 0.56 |
| Acvr1         | 11477  | 0.49 |
| Itgb3         | 16416  | 0.21 |
| Lamp2         | 16784  | 0.60 |
| Mbnl2         | 105559 | 0.36 |
| Zfp827        | 622675 | 0.72 |
| Nr2f2         | 11819  | 0.94 |
| Rnf216        | 108086 | 0.81 |
| E2f2          | 242705 | 0.98 |
| Il28ra        | 242700 | 0.17 |
| Bahd1         | 228536 | 0.76 |
| Ppp6c         | 67857  | 0.70 |
| Slc16a9       | 66859  | 0.85 |
| Hn1           | 15374  | 0.86 |
| Usp42         | 76800  | 0.50 |
| Trim36        | 28105  | 0.83 |
| Tgfbrap1      | 73122  | 0.45 |
| Phc3          | 241915 | 0.86 |
| Rbl1          | 19650  | 0.61 |
| Mbnl1         | 56758  | 0.62 |
| Txnip         | 56338  | 0.93 |
| Prkaa1        | 105787 | 0.04 |
| Snrk          | 20623  | 0.80 |
| 4933403F05Rik | 108654 | 0.86 |
| Pbx3          | 18516  | 0.66 |
| Arnt2         | 11864  | 0.75 |
| Pbx1          | 18514  | 0.01 |
| Kat2b         | 18519  | 0.60 |
| Fzd6          | 14368  | 0.39 |
| Cc2d1a        | 212139 | 0.49 |
| Nfib          | 18028  | 0.85 |
| Clip4         | 78785  | 0.60 |
| Klf13         | 50794  | 0.70 |
| Mfn2          | 170731 | 0.57 |
| Map3k2        | 26405  | 0.97 |



|               |        |      |
|---------------|--------|------|
| Fam168b       | 214469 | 0.81 |
| Inhbb         | 16324  | 0.76 |
| Cpeb2         | 231207 | 0.76 |
| Crtc2         | 74343  | 0.67 |
| Tnrc6c        | 217351 | 0.43 |
| Znfx1         | 98999  | 0.66 |
| Fbxo10        | 269529 | 0.37 |
| Slc17a5       | 235504 | 0.07 |
| Stk38l        | 232533 | 0.79 |
| Zfp597        | 71063  | 0.50 |
| Zfp91         | 109910 | 0.41 |
| Clic4         | 29876  | 0.65 |
| Tbc1d8b       | 245638 | 0.46 |
| 9530068E07Rik | 213673 | 0.03 |
| Kif13a        | 16553  | 0.05 |
| Brp44l        | 55951  | 0.28 |
| Rab11fip5     | 52055  | 0.85 |
| Znf512b       | 269401 | 0.65 |
| Lefty1        | 13590  | 0.53 |
| Usp46         | 69727  | 0.55 |
| Jazf1         | 231986 | 0.71 |
| Lefty2        | 320202 | 0.78 |
| Tmem123       | 71929  | 0.61 |
| Pfn2          | 18645  | 0.52 |
| Mtus1         | 102103 | 0.81 |
| 4933434E20Rik | 99650  | 0.45 |
| Syap1         | 67043  | 0.40 |
| Sbf1          | 77980  | 0.22 |
| Uevld         | 54122  | 0.73 |
| Arhgef7       | 54126  | 0.80 |
| Neo1          | 18007  | 0.16 |
| Necap1        | 67602  | 0.14 |
| Zfp704        | 170753 | 0.29 |
| Gcap14        | 72972  | 0.02 |
| Slc25a40      | 319653 | 0.74 |
| Sass6         | 72776  | 0.33 |
| Cfl2          | 12632  | 0.37 |
| Adam9         | 11502  | 0.64 |
| Psmf1         | 228769 | 0.07 |
| Zbtb4         | 75580  | 0.50 |
| Arid4b        | 94246  | 0.64 |
| Fbxo11        | 225055 | 0.71 |
| Tapt1         | 231225 | 0.67 |
| Tgfbr2        | 21813  | 0.90 |
| Etv1          | 14009  | 0.17 |
| Zcchc24       | 71918  | 0.62 |
| Mllt6         | 246198 | 0.95 |
| Rhoc          | 11853  | 0.36 |
| Tmcc1         | 330401 | 0.30 |

|               |        |      |
|---------------|--------|------|
| Camk2n1       | 66259  | 0.82 |
| Mtmr4         | 170749 | 0.53 |
| Hhip          | 15245  | 0.79 |
| Zbtb37        | 240869 | 0.02 |
| Il6st         | 16195  | 0.76 |
| Zkscan1       | 74570  | 0.82 |
| Tiparp        | 99929  | 0.41 |
| Clock         | 12753  | 0.75 |
| Twf1          | 19230  | 0.51 |
| Eif2c1        | 236511 | 0.95 |
| E2f7          | 52679  | 0.95 |
| Fam120a       | 218236 | 0.42 |
| Pank3         | 211347 | 0.33 |
| Mast3         | 546071 | 0.70 |
| Foxj2         | 60611  | 0.59 |
| Wdr26         | 226757 | 0.40 |
| Smarcc2       | 68094  | 0.65 |
| Syde1         | 71709  | 0.75 |
| Ptpn21        | 24000  | 0.78 |
| Dctn4         | 67665  | 0.54 |
| Hipk3         | 15259  | 0.60 |
| Cdkn1a        | 12575  | 0.79 |
| Ralgds        | 19730  | 0.44 |
| Nfya          | 18044  | 0.49 |
| Tanc2         | 77097  | 0.52 |
| Rora          | 19883  | 0.34 |
| Coro2b        | 235431 | 0.40 |
| Ash1l         | 192195 | 0.54 |
| Cxcr4         | 12767  | 0.72 |
| Derl2         | 116891 | 0.87 |
| Dpp8          | 74388  | 0.61 |
| Rab11a        | 53869  | 0.14 |
| Zfyve26       | 211978 | 0.67 |
| Tnrc18        | 231861 | 0.79 |
| Cdk19         | 78334  | 0.85 |
| Asf1b         | 66929  | 0.80 |
| Rsf1          | 233532 | 0.61 |
| Epas1         | 13819  | 0.31 |
| Myst3         | 244349 | 0.42 |
| D630045J12Rik | 330286 | 0.73 |
| Ube2b         | 22210  | 0.76 |
| E2f5          | 13559  | 0.53 |
| Acbd5         | 74159  | 0.68 |
| Unkl          | 74154  | 0.86 |
| Wdr37         | 207615 | 0.97 |
| Phlpp2        | 244650 | 0.92 |
| Zfp238        | 30928  | 0.75 |
| Prdm16        | 70673  | 0.88 |
| Tmem170b      | 621976 | 0.97 |

|          |        |      |
|----------|--------|------|
| Ss1811   | 269397 | 0.86 |
| March11  | 211147 | 0.16 |
| Reep3    | 28193  | 0.90 |
| Zdhhc9   | 208884 | 0.47 |
| Acer3    | 66190  | 0.33 |
| Golga1   | 76899  | 0.35 |
| Hivep2   | 15273  | 0.71 |
| Arhgef10 | 234094 | 0.41 |

**Table 2.** Genes predicted to be a direct target of the miR AAGUGCU seed family (by TargetScan) and that are significantly downregulated within all three experiments.

| name                              | zvalue | abbreviation |
|-----------------------------------|--------|--------------|
| AAGUGCU                           | -47.94 | miR-294      |
| IRF1,2,7.p3                       | -16.29 | IRF1,2,7     |
| bHLH_family.p2                    | 13.00  | bHLH..       |
| HIC1.p2                           | -11.95 | HIC1         |
| TFEB.p2                           | -11.90 | TFEB         |
| ARNT_ARNT2_BHLHB2_MAX_MYC_USF1.p2 | 11.60  | ARNT..       |
| PRDM1.p3                          | -10.67 | PRDM1        |
| TBP.p2                            | 9.83   | TBP          |
| SRF.p3                            | 9.69   | SRF          |
| SP1.p2                            | -9.06  | SP1          |
| PAX5.p2                           | -8.97  | PAX5         |
| AHR_ARNT_ARNT2.p2                 | 8.39   | AHR..        |
| HMX1.p2                           | 8.29   | HMX1         |
| ZNF143.p2                         | 8.22   | ZNF143       |
| TFDP1.p2                          | 7.88   | TFDP1        |
| NFKB1_REL_RELA.p2                 | -7.53  | NFKB1..      |
| RFX1..5_RFXANK_RFXAP.p2           | -7.25  | RFX1..5..    |
| MYB.p2                            | -7.07  | MYB          |
| FOXD3.p2                          | 7.02   | FOXD3        |
| DMAP1_NCOR{1,2}_SMARC.p2          | -6.98  | ..SMARC      |
| ELK1,4_GABP{A,B1}.p3              | 6.79   | ELK1,4..     |
| PAX2.p2                           | -6.70  | PAX2         |
| E2F1..5.p2                        | 6.62   | E2F1..5      |
| MAFB.p2                           | -6.54  | MAFB         |
| HES1.p2                           | 6.50   | HES1         |
| FOXA2.p3                          | 6.30   | FOXA2        |
| FOXN1.p2                          | -6.24  | FOXN1        |
| SOX5.p2                           | 6.08   | SOX5         |
| FOX{I1,J2}.p2                     | -5.62  | FOXI1,J2     |
| TFAP2B.p2                         | -5.55  | TFAP2B       |
| ZEB1.p2                           | 5.49   | ZEB1         |
| PATZ1.p2                          | 5.45   | PATZ1        |
| HOX{A6,A7,B6,B7}.p2               | -5.27  | HOXA6,A..    |
| SPZ1.p2                           | -5.26  | SPZ1         |
| DBP.p2                            | -5.11  | DBP          |
| HOX{A5,B5}.p2                     | 5.07   | HOXA5,B5     |
| REST.p3                           | 5.06   | REST         |
| PITX1..3.p2                       | 5.06   | PITX1..3     |
| PAX4.p2                           | -4.94  | PAX4         |
| TAL1_TCF{3,4,12}.p2               | -4.84  | TAL1..       |
| SRY.p2                            | -4.82  | SRY          |
| BACH2.p2                          | -4.82  | BACH2        |
| TGIF1.p2                          | -4.80  | TGIF1        |
| NRF1.p2                           | 4.79   | NRF1         |
| FOXL1.p2                          | -4.76  | FOXL1        |
| STAT5{A,B}.p2                     | -4.70  | STAT5A,B     |
| NFE2L2.p2                         | 4.51   | NFE2L2       |
| SNAI1..3.p2                       | -4.47  | SNAI1..3     |

|                        |       |           |
|------------------------|-------|-----------|
| ETS1,2.p2              | -4.41 | ETS1,2    |
| ATF5_CREB3.p2          | -4.29 | ATF5..    |
| RBPJ.p2                | -4.20 | RBPJ      |
| ZNF238.p2              | 4.19  | ZNF238    |
| MZF1.p2                | -4.17 | MZF1      |
| IKZF1.p2               | 4.17  | IKZF1     |
| POU5F1_SOX2{dimer}.p2  | 4.07  | POU5F1..  |
| NFE2.p2                | -3.90 | NFE2      |
| ZNF384.p2              | -3.87 | ZNF384    |
| GLI1..3.p2             | -3.74 | GLI1..3   |
| FOXO1,3,4.p2           | -3.66 | FOXO1,3,4 |
| TEAD1.p2               | -3.63 | TEAD1     |
| TFCP2.p2               | -3.58 | TFCP2     |
| KLF4.p3                | -3.53 | KLF4      |
| GATA6.p2               | 3.47  | GATA6     |
| ATF6.p2                | 3.46  | ATF6      |
| TLX1..3_NFIC{dimer}.p2 | -3.45 | TLX1..3.. |
| JUN.p2                 | 3.44  | JUN       |
| MTF1.p2                | -3.26 | MTF1      |
| ZBTB16.p2              | 3.09  | ZBTB16    |
| POU6F1.p2              | 3.09  | POU6F1    |
| HMGA1,2.p2             | 3.03  | HMGA1,2   |
| FOX{D1,D2}.p2          | -2.97 | FOXD1,D2  |
| FOXQ1.p2               | -2.94 | FOXQ1     |
| MYFfamily.p2           | 2.94  | MYFfamily |
| KLF12.p2               | 2.80  | KLF12     |
| LMO2.p2                | -2.74 | LMO2      |
| SREBF1,2.p2            | -2.74 | SREBF1,2  |
| CEBPA,B_DDIT3.p2       | 2.68  | CEBPA,B.. |
| CDX1,2,4.p2            | -2.68 | CDX1,2,4  |
| FEV.p2                 | 2.62  | FEV       |
| CTCF.p2                | 2.62  | CTCF      |
| STAT2,4,6.p2           | -2.55 | STAT2,4,6 |
| MAZ.p2                 | -2.54 | MAZ       |
| PBX1.p2                | -2.54 | PBX1      |
| NR1H4.p2               | 2.47  | NR1H4     |
| EVI1.p2                | -2.41 | EVI1      |
| PRRX1,2.p2             | -2.36 | PRRX1,2   |
| NKX3-1.p2              | -2.26 | NKX3-1    |
| NANOG{mouse}.p2        | 2.18  | NANOGmo.. |
| LHX3,4.p2              | 2.18  | LHX3,4    |
| HOX{A4,D4}.p2          | 2.12  | HOXA4,D4  |
| SPI1.p2                | -2.10 | SPI1      |
| HIF1A.p2               | 2.09  | HIF1A     |
| EHF.p2                 | -2.08 | EHF       |
| NFIX.p2                | -2.07 | NFIX      |
| NANOG.p2               | 2.02  | NANOG     |
| GFI1.p2                | 2.00  | GFI1      |
| RXR{A,B,G}.p2          | 1.93  | RXRA,B,G  |

|                       |       |           |
|-----------------------|-------|-----------|
| RREB1.p2              | 1.90  | RREB1     |
| ATF4.p2               | 1.90  | ATF4      |
| EOMES.p2              | -1.81 | EOMES     |
| EN1,2.p2              | -1.81 | EN1,2     |
| RORA.p2               | 1.79  | RORA      |
| TCF4_dimer.p2         | 1.77  | TCF4..    |
| RXRA_VDR{dimer}.p2    | 1.76  | RXRA..    |
| HAND1,2.p2            | 1.70  | HAND1,2   |
| MYOD1.p2              | -1.67 | MYOD1     |
| LEF1_TCF7_TCF7L1,2.p2 | 1.65  | LEF1..    |
| ZFP161.p2             | -1.62 | ZFP161    |
| PPARG.p2              | -1.62 | PPARG     |
| NKX2-2,8.p2           | -1.62 | NKX2-2,8  |
| STAT1,3.p3            | -1.61 | STAT1,3   |
| SOX17.p2              | -1.57 | SOX17     |
| EWSR1-FLI1.p2         | 1.56  | EWSR1-F.. |
| GFI1B.p2              | -1.55 | GFI1B     |
| EP300.p2              | -1.54 | EP300     |
| ALX1.p2               | -1.51 | ALX1      |
| ZBTB6.p2              | -1.51 | ZBTB6     |
| ATF2.p2               | -1.47 | ATF2      |
| AR.p2                 | -1.47 | AR        |
| SOX{8,9,10}.p2        | 1.45  | SOX8,9,10 |
| ADNP_IRX_SIX_ZHX.p2   | 1.39  | ADNP..    |
| RXRG_dimer.p3         | 1.35  | RXRG..    |
| TFAP2{A,C}.p2         | -1.31 | TFAP2A,C  |
| VSX1,2.p2             | -1.24 | VSX1,2    |
| GZF1.p2               | -1.22 | GZF1      |
| PDX1.p2               | 1.22  | PDX1      |
| PAX6.p2               | -1.18 | PAX6      |
| NKX2-1,4.p2           | -1.15 | NKX2-1,4  |
| CUX2.p2               | -1.13 | CUX2      |
| NR5A1,2.p2            | 1.05  | NR5A1,2   |
| POU5F1.p2             | -1.05 | POU5F1    |
| NKX6-1,2.p2           | 1.02  | NKX6-1,2  |
| SPIB.p2               | 1.02  | SPIB      |
| ELF1,2,4.p2           | 0.99  | ELF1,2,4  |
| CRX.p2                | -0.96 | CRX       |
| NKX2-3_NKX2-5.p2      | 0.94  | NKX2-3..  |
| IKZF2.p2              | 0.93  | IKZF2     |
| GTF2I.p2              | -0.92 | GTF2I     |
| GATA1..3.p2           | -0.91 | GATA1..3  |
| ONECUT1,2.p2          | -0.87 | ONECUT1,2 |
| MYBL2.p2              | 0.85  | MYBL2     |
| FOX{C1,C2}.p2         | 0.84  | FOXC1,C2  |
| XBP1.p3               | -0.75 | XBP1      |
| FOX{F1,F2,J1}.p2      | -0.75 | FOXF1,F.. |
| ESR1.p2               | 0.70  | ESR1      |
| NFIL3.p2              | 0.69  | NFIL3     |

|                           |       |           |
|---------------------------|-------|-----------|
| ARID5B.p2                 | 0.69  | ARID5B    |
| NFE2L1.p2                 | 0.67  | NFE2L1    |
| NFATC1..3.p2              | 0.67  | NFATC1..3 |
| ZIC1..3.p2                | 0.62  | ZIC1..3   |
| HOXA9_MEIS1.p2            | 0.60  | HOXA9..   |
| T.p2                      | -0.56 | T         |
| PAX8.p2                   | 0.51  | PAX8      |
| ESRRA.p2                  | 0.50  | ESRRA     |
| CREB1.p2                  | -0.50 | CREB1     |
| ZNF423.p2                 | -0.48 | ZNF423    |
| SOX2.p2                   | 0.47  | SOX2      |
| POU2F1..3.p2              | -0.45 | POU2F1..3 |
| NFY{A,B,C}.p2             | 0.44  | NFYA,B,C  |
| TFAP4.p2                  | -0.44 | TFAP4     |
| HSF1,2.p2                 | -0.44 | HSF1,2    |
| HLF.p2                    | 0.43  | HLF       |
| HNF1A.p2                  | 0.41  | HNF1A     |
| YY1.p2                    | -0.41 | YY1       |
| TLX2.p2                   | 0.40  | TLX2      |
| MSX1,2.p2                 | -0.40 | MSX1,2    |
| TP53.p2                   | 0.38  | TP53      |
| HBP1_HMGB_SSRP1_UBTF.p2   | -0.36 | HBP1..    |
| FOXP3.p2                  | -0.36 | FOXP3     |
| AIRE.p2                   | 0.33  | AIRE      |
| EBF1.p2                   | -0.32 | EBF1      |
| TBX4,5.p2                 | 0.32  | TBX4,5    |
| EGR1..3.p2                | 0.32  | EGR1..3   |
| SMAD1..7,9.p2             | -0.31 | SMAD1.... |
| FOSL2.p2                  | 0.31  | FOSL2     |
| FOS_FOS{B,L1}_JUN{B,D}.p2 | 0.31  | FOS..     |
| HNF4A_NR2F1,2.p2          | -0.29 | HNF4A..   |
| NKX3-2.p2                 | -0.26 | NKX3-2    |
| POU3F1..4.p2              | -0.25 | POU3F1..4 |
| PAX3,7.p2                 | 0.24  | PAX3,7    |
| NR6A1.p2                  | -0.24 | NR6A1     |
| NHLH1,2.p2                | 0.22  | NHLH1,2   |
| NR3C1.p2                  | -0.21 | NR3C1     |
| CDC5L.p2                  | -0.19 | CDC5L     |
| GTF2A1,2.p2               | 0.13  | GTF2A1,2  |
| MEF2{A,B,C,D}.p2          | 0.11  | MEF2A,B.. |
| BPTF.p2                   | 0.11  | BPTF      |
| ZNF148.p2                 | 0.05  | ZNF148    |
| RUNX1..3.p2               | 0.04  | RUNX1..3  |
| POU1F1.p2                 | -0.03 | POU1F1    |

**Table 3. Three experiments** combined MARA results **including only the miR AAGUGCU seed family** ranked by absolute activity z-values.

| name                              | zvalue | abbreviation |
|-----------------------------------|--------|--------------|
| AAGUGCU                           | -31.81 | miR-294      |
| AAAGUGC                           | -31.28 | miR-17-..    |
| IRF1,2,7.p3                       | -17.15 | IRF1,2,7     |
| bHLH_family.p2                    | 13.43  | bHLH..       |
| TFEB.p2                           | -11.44 | TFEB         |
| HIC1.p2                           | -11.25 | HIC1         |
| ARNT_ARNT2_BHLHB2_MAX_MYC_USF1.p2 | 11.16  | ARNT..       |
| AAGGCAC                           | -11.02 | miR-124      |
| PRDM1.p3                          | -10.68 | PRDM1        |
| UCAAGUA                           | -10.22 | miR-26a..    |
| AGCACCA                           | 9.68   | miR-29a..    |
| CAGUGCA                           | -9.67  | miR-148..    |
| TBP.p2                            | 9.26   | TBP          |
| SP1.p2                            | -9.08  | SP1          |
| SRF.p3                            | 8.94   | SRF          |
| PAX5.p2                           | -8.51  | PAX5         |
| AHR_ARNT_ARNT2.p2                 | 8.28   | AHR..        |
| TFDP1.p2                          | 8.25   | TFDP1        |
| ZNF143.p2                         | 8.15   | ZNF143       |
| HMX1.p2                           | 7.83   | HMX1         |
| GUGCAA                            | -7.42  | miR-19a..    |
| NFKB1.REL.RELA.p2                 | -7.23  | NFKB1..      |
| RFX1..5_RFXANK_RFXAP.p2           | -7.11  | RFX1..5..    |
| DMAP1_NCOR{1,2}_SMARC.p2          | -6.94  | ..SMARC      |
| FOXD3.p2                          | 6.94   | FOXD3        |
| MYB.p2                            | -6.86  | MYB          |
| ELK1,4_GABP{A,B1}.p3              | 6.78   | ELK1,4..     |
| AGUGCAA                           | -6.73  | miR-130..    |
| HES1.p2                           | 6.71   | HES1         |
| E2F1..5.p2                        | 6.61   | E2F1..5      |
| GUAGUGU                           | -6.52  | miR-142..    |
| FOXA2.p3                          | 6.49   | FOXA2        |
| SOX5.p2                           | 6.00   | SOX5         |
| MAFB.p2                           | -5.95  | MAFB         |
| FOXN1.p2                          | -5.86  | FOXN1        |
| GGAAGAC                           | 5.70   | miR-7a-7b    |
| FOX{I1,J2}.p2                     | -5.68  | FOXI1,J2     |
| PAX2.p2                           | -5.66  | PAX2         |
| PATZ1.p2                          | 5.54   | PATZ1        |
| AGCAGCA                           | -5.51  | miR-15a..    |
| DBP.p2                            | -5.35  | DBP          |
| HOX{A6,A7,B6,B7}.p2               | -5.25  | HOXA6,A..    |
| ZEB1.p2                           | 5.24   | ZEB1         |
| NRF1.p2                           | 5.21   | NRF1         |
| SPZ1.p2                           | -5.19  | SPZ1         |
| CUUUGGU                           | -5.13  | miR-9        |
| AGUGGUU                           | -5.10  | miR-140..    |
| TFAP2B.p2                         | -5.08  | TFAP2B       |



|                        |       |           |
|------------------------|-------|-----------|
| TAL1_TCF{3,4,12}.p2    | -4.99 | TAL1..    |
| SRY.p2                 | -4.93 | SRY       |
| FOXL1.p2               | -4.80 | FOXL1     |
| PITX1..3.p2            | 4.70  | PITX1..3  |
| BACH2.p2               | -4.66 | BACH2     |
| GGCUCAG                | 4.64  | miR-24    |
| PAX4.p2                | -4.60 | PAX4      |
| AAGGUGC                | -4.55 | miR-18a.. |
| STAT5{A,B}.p2          | -4.55 | STAT5A,B  |
| REST.p3                | 4.49  | REST      |
| ETS1,2.p2              | -4.47 | ETS1,2    |
| HOX{A5,B5}.p2          | 4.40  | HOXA5,B5  |
| TGIF1.p2               | -4.36 | TGIF1     |
| SNAI1..3.p2            | -4.28 | SNAI1..3  |
| NFE2L2.p2              | 4.27  | NFE2L2    |
| IKZF1.p2               | 4.21  | IKZF1     |
| RBPJ.p2                | -4.17 | RBPJ      |
| CACAGUG                | -4.05 | miR-128   |
| FOXO1,3,4.p2           | -4.03 | FOXO1,3,4 |
| GAGGUAG                | 4.02  | let-7a-.. |
| ZNF384.p2              | -3.87 | ZNF384    |
| MZF1.p2                | -3.86 | MZF1      |
| AAUACUG                | -3.79 | miR-200.. |
| NFE2.p2                | -3.79 | NFE2      |
| ATF5_CREB3.p2          | -3.75 | ATF5..    |
| ZNF238.p2              | 3.74  | ZNF238    |
| CAGCAGG                | 3.73  | miR-214.. |
| POU5F1_SOX2{dimer}.p2  | 3.73  | POU5F1..  |
| AUUGCAC                | -3.66 | miR-25-.. |
| GATA6.p2               | 3.54  | GATA6     |
| JUN.p2                 | 3.51  | JUN       |
| UGUGCUU                | 3.49  | miR-218   |
| GLI1..3.p2             | -3.46 | GLI1..3   |
| TFCP2.p2               | -3.44 | TFCP2     |
| UCACAGU                | 3.42  | miR-27a.. |
| CCCUGAG                | -3.33 | miR-125.. |
| TLX1..3_NFIC{dimer}.p2 | -3.32 | TLX1..3.. |
| UUGGCAC                | -3.30 | miR-96    |
| TEAD1.p2               | -3.29 | TEAD1     |
| HMGA1,2.p2             | 3.20  | HMGA1,2   |
| AGCUGCC                | 3.12  | miR-22    |
| KLF4.p3                | -3.11 | KLF4      |
| POU6F1.p2              | 3.08  | POU6F1    |
| GUCAGUU                | -3.07 | miR-223   |
| GUAAACA                | -3.07 | miR-30a.. |
| AGCAGCG                | 3.07  | miR-503   |
| ATF6.p2                | 3.06  | ATF6      |
| ZBTB16.p2              | 3.04  | ZBTB16    |
| AUGGCAC                | -2.99 | miR-183   |

|                       |       |           |
|-----------------------|-------|-----------|
| MTF1.p2               | -2.98 | MTF1      |
| FOX{D1,D2}.p2         | -2.91 | FOXD1,D2  |
| GCUGGUG               | 2.90  | miR-138   |
| UUUUUGC               | 2.83  | miR-129.. |
| LMO2.p2               | -2.82 | LMO2      |
| FOXQ1.p2              | -2.78 | FOXQ1     |
| SREBF1,2.p2           | -2.78 | SREBF1,2  |
| CDX1,2,4.p2           | -2.76 | CDX1,2,4  |
| KLF12.p2              | 2.76  | KLF12     |
| MYFfamily.p2          | 2.75  | MYFfamily |
| STAT2,4,6.p2          | -2.70 | STAT2,4,6 |
| MAZ.p2                | -2.67 | MAZ       |
| FEV.p2                | 2.62  | FEV       |
| ACAGUAU               | 2.59  | miR-144   |
| HIF1A.p2              | 2.56  | HIF1A     |
| NR1H4.p2              | 2.49  | NR1H4     |
| PBX1.p2               | -2.44 | PBX1      |
| AACACUG               | -2.39 | miR-141.. |
| CTCF.p2               | 2.39  | CTCF      |
| EVI1.p2               | -2.36 | EVI1      |
| UGCAUAG               | 2.23  | miR-153   |
| CEBPA,B_DDIT3.p2      | 2.22  | CEBPA,B.. |
| NKX3-1.p2             | -2.20 | NKX3-1    |
| CCAGCAU               | 2.14  | miR-338.. |
| RREB1.p2              | 2.14  | RREB1     |
| GAUUGUC               | -2.12 | miR-219.. |
| RXR{A,B,G}.p2         | 2.10  | RXRA,B,G  |
| GGAAUGU               | -2.10 | miR-1a..  |
| CCUUCAU               | -2.05 | miR-205   |
| ACCCUGU               | 2.04  | miR-10a.. |
| ATF4.p2               | 2.04  | ATF4      |
| EHF.p2                | -1.97 | EHF       |
| LHX3,4.p2             | 1.97  | LHX3,4    |
| GFI1.p2               | 1.96  | GFI1      |
| NANOG.p2              | 1.95  | NANOG     |
| UUGGUCC               | 1.94  | miR-133.. |
| LEF1_TCF7_TCF7L1,2.p2 | 1.91  | LEF1..    |
| UCCCUUU               | 1.91  | miR-204.. |
| HOX{A4,D4}.p2         | 1.90  | HOXA4,D4  |
| RXRA_VDR{dimer}.p2    | 1.76  | RXRA..    |
| GCUACAU               | -1.76 | miR-221.. |
| ADNP_IRX_SIX_ZHX.p2   | 1.75  | ADNP..    |
| EN1,2.p2              | -1.75 | EN1,2     |
| CUCCCAA               | 1.73  | miR-150.. |
| TCF4_dimer.p2         | 1.73  | TCF4..    |
| EOMES.p2              | -1.73 | EOMES     |
| UCACAUU               | 1.72  | miR-23a.. |
| CCAGUGU               | -1.71 | miR-199.. |
| NANOG{mouse}.p2       | 1.71  | NANOGmo.. |

|                  |       |           |
|------------------|-------|-----------|
| GUAACAG          | -1.70 | miR-194   |
| NFIX.p2          | -1.67 | NFIX      |
| EWSR1-FLI1.p2    | 1.65  | EWSR1-F.. |
| AAUCUCU          | 1.64  | miR-216b  |
| ACAGUAC          | -1.63 | miR-101.. |
| MYOD1.p2         | -1.62 | MYOD1     |
| EP300.p2         | -1.60 | EP300     |
| PPARG.p2         | -1.58 | PPARG     |
| GAUCAGA          | -1.55 | miR-383   |
| ALX1.p2          | -1.54 | ALX1      |
| NKX2-2,8.p2      | -1.53 | NKX2-2,8  |
| GFI1B.p2         | -1.48 | GFI1B     |
| UUGGCAA          | 1.48  | miR-182   |
| SPI1.p2          | -1.42 | SPI1      |
| GCAGCAU          | 1.37  | miR-103.. |
| ZFP161.p2        | -1.36 | ZFP161    |
| AR.p2            | -1.34 | AR        |
| ATF2.p2          | -1.31 | ATF2      |
| HAND1,2.p2       | 1.30  | HAND1,2   |
| SOX{8,9,10}.p2   | 1.29  | SOX8,9,10 |
| PRRX1,2.p2       | -1.27 | PRRX1,2   |
| GZF1.p2          | -1.24 | GZF1      |
| ZBTB6.p2         | -1.23 | ZBTB6     |
| FOX{C1,C2}.p2    | 1.21  | FOXC1,C2  |
| AACGGAA          | 1.20  | miR-191   |
| TFAP2{A,C}.p2    | -1.18 | TFAP2A,C  |
| UGACCUA          | 1.18  | miR-192.. |
| AUGGCUU          | 1.17  | miR-135.. |
| SOX2.p2          | 1.15  | SOX2      |
| AGGUAGU          | 1.13  | miR-196.. |
| AGCUUUAU         | -1.13 | miR-21-.. |
| UUGUUCG          | -1.13 | miR-375   |
| RXRG_dimer.p3    | 1.12  | RXRG..    |
| NKX6-1,2.p2      | 1.11  | NKX6-1,2  |
| CRX.p2           | -1.11 | CRX       |
| VSX1,2.p2        | -1.11 | VSX1,2    |
| NKX2-3_NKX2-5.p2 | 1.09  | NKX2-3..  |
| RORA.p2          | 1.09  | RORA      |
| POU5F1.p2        | -1.08 | POU5F1    |
| AAUCUCA          | 1.06  | miR-216a  |
| PAX6.p2          | -1.05 | PAX6      |
| NKX2-1,4.p2      | -1.04 | NKX2-1,4  |
| UAUUGCU          | -1.04 | miR-137   |
| PDX1.p2          | 0.99  | PDX1      |
| CUX2.p2          | -0.99 | CUX2      |
| SPIB.p2          | 0.98  | SPIB      |
| IKZF2.p2         | 0.97  | IKZF2     |
| ELF1,2,4.p2      | 0.97  | ELF1,2,4  |
| GAGAACU          | -0.96 | miR-146.. |

|                  |       |           |
|------------------|-------|-----------|
| ONECUT1,2.p2     | -0.95 | ONECUT1,2 |
| UAAUGCU          | -0.95 | miR-155   |
| EBF1.p2          | -0.92 | EBF1      |
| GGCAAGA          | -0.91 | miR-31    |
| MYBL2.p2         | 0.86  | MYBL2     |
| NR5A1,2.p2       | 0.85  | NR5A1,2   |
| CGUACCG          | 0.84  | miR-126.. |
| AACCUGG          | -0.84 | miR-490.. |
| UCCAGUU          | -0.81 | miR-145   |
| GATA1..3.p2      | -0.79 | GATA1..3  |
| XBP1.p3          | -0.74 | XBP1      |
| GAGAUGA          | -0.74 | miR-143   |
| UGUGCGU          | 0.71  | miR-210   |
| NFIL3.p2         | 0.71  | NFIL3     |
| NFATC1..3.p2     | 0.68  | NFATC1..3 |
| FOX{F1,F2,J1}.p2 | -0.66 | FOXF1,F.. |
| AACAGUC          | -0.66 | miR-132.. |
| AUGACAC          | 0.65  | miR-425.. |
| CREB1.p2         | -0.65 | CREB1     |
| UAAGACG          | -0.64 | miR-208.. |
| ARID5B.p2        | 0.63  | ARID5B    |
| SOX17.p2         | -0.62 | SOX17     |
| STAT1,3.p3       | -0.58 | STAT1,3   |
| ZIC1..3.p2       | 0.58  | ZIC1..3   |
| PAX8.p2          | 0.51  | PAX8      |
| ESRRA.p2         | 0.51  | ESRRA     |
| T.p2             | -0.51 | T         |
| SMAD1..7,9.p2    | -0.51 | SMAD1.... |
| AAUGCCC          | -0.50 | miR-365   |
| ACAUUCA          | -0.47 | miR-181.. |
| HSF1,2.p2        | -0.46 | HSF1,2    |
| HLF.p2           | 0.44  | HLF       |
| NFY{A,B,C}.p2    | 0.44  | NFYA,B,C  |
| TLX2.p2          | 0.44  | TLX2      |
| TFAP4.p2         | -0.43 | TFAP4     |
| ESR1.p2          | 0.43  | ESR1      |
| UGCAUUG          | 0.43  | miR-33    |
| YY1.p2           | -0.42 | YY1       |
| HNF1A.p2         | 0.41  | HNF1A     |
| TP53.p2          | 0.41  | TP53      |
| FOXP3.p2         | -0.41 | FOXP3     |
| HOXA9_MEIS1.p2   | 0.39  | HOXA9..   |
| GGAGUGU          | 0.39  | miR-122   |
| NFE2L1.p2        | 0.38  | NFE2L1    |
| HNF4A_NR2F1,2.p2 | -0.36 | HNF4A..   |
| CUACAGU          | -0.36 | miR-139.. |
| MSX1,2.p2        | -0.35 | MSX1,2    |
| ACUGGCC          | -0.34 | miR-193.. |
| EGR1..3.p2       | 0.34  | EGR1..3   |

|                           |       |           |
|---------------------------|-------|-----------|
| GAUAUGU                   | -0.34 | miR-190.. |
| AIRE.p2                   | 0.32  | AIRE      |
| GGACGGA                   | 0.32  | miR-184   |
| ZNF423.p2                 | -0.31 | ZNF423    |
| NR3C1.p2                  | -0.28 | NR3C1     |
| GTF2A1,2.p2               | 0.27  | GTF2A1,2  |
| CDC5L.p2                  | -0.26 | CDC5L     |
| POU2F1..3.p2              | -0.25 | POU2F1..3 |
| HBP1_HMGB_SSRP1_UBTF.p2   | -0.23 | HBP1..    |
| FOS_FOS{B,L1}_JUN{B,D}.p2 | 0.23  | FOS..     |
| FOSL2.p2                  | 0.20  | FOSL2     |
| UAAGACU                   | 0.20  | miR-499   |
| PAX3,7.p2                 | 0.20  | PAX3,7    |
| NHLH1,2.p2                | 0.19  | NHLH1,2   |
| POU3F1..4.p2              | -0.18 | POU3F1..4 |
| AACCGUU                   | 0.16  | miR-451   |
| ZNF148.p2                 | -0.16 | ZNF148    |
| CGUGUCU                   | 0.15  | miR-187   |
| NR6A1.p2                  | -0.15 | NR6A1     |
| GTF2I.p2                  | -0.14 | GTF2I     |
| ACUGCAU                   | -0.14 | miR-217   |
| NKX3-2.p2                 | -0.13 | NKX3-2    |
| MEF2{A,B,C,D}.p2          | 0.12  | MEF2A,B.. |
| BPTF.p2                   | 0.09  | BPTF      |
| GGCAGUG                   | -0.06 | miR-34a.. |
| POU1F1.p2                 | -0.05 | POU1F1    |
| RUNX1..3.p2               | -0.04 | RUNX1..3  |
| UGAAAUG                   | 0.04  | miR-203   |
| ACCCGUA                   | -0.03 | miR-99a.. |
| TBX4,5.p2                 | -0.00 | TBX4,5    |

**Table 4. Three experiments** combined MARA results **including all miRNA seed families** ranked by absolute activity z-values.

| name                              | zvalue | abbreviation |
|-----------------------------------|--------|--------------|
| AAGUGCU                           | -53.51 | miR-294      |
| IRF1,2,7.p3                       | -17.49 | IRF1,2,7     |
| bHLH_family.p2                    | 16.54  | bHLH..       |
| TFEB.p2                           | -13.77 | TFEB         |
| ARNT_ARNT2_BHLHB2_MAX_MYC_USF1.p2 | 13.32  | ARNT..       |
| HIC1.p2                           | -12.99 | HIC1         |
| PRDM1.p3                          | -12.64 | PRDM1        |
| NFKB1_REL_RELA.p2                 | -11.77 | NFKB1..      |
| PAX5.p2                           | -10.90 | PAX5         |
| SP1.p2                            | -9.31  | SP1          |
| HES1.p2                           | 9.26   | HES1         |
| AHR_ARNT_ARNT2.p2                 | 9.19   | AHR..        |
| TFDP1.p2                          | 9.11   | TFDP1        |
| HMX1.p2                           | 8.67   | HMX1         |
| SPZ1.p2                           | -8.66  | SPZ1         |
| ZNF143.p2                         | 8.61   | ZNF143       |
| ELK1,4_GABP{A,B1}.p3              | 8.45   | ELK1,4..     |
| FOXD3.p2                          | 8.22   | FOXD3        |
| FOX{D1,D2}.p2                     | -8.11  | FOXD1,D2     |
| NRF1.p2                           | 7.82   | NRF1         |
| PITX1..3.p2                       | 7.80   | PITX1..3     |
| TEAD1.p2                          | -7.61  | TEAD1        |
| PAX2.p2                           | -7.56  | PAX2         |
| SOX5.p2                           | 7.29   | SOX5         |
| HOX{A6,A7,B6,B7}.p2               | -7.23  | HOXA6,A..    |
| E2F1..5.p2                        | 6.98   | E2F1..5      |
| SNAI1..3.p2                       | -6.78  | SNAI1..3     |
| ZEB1.p2                           | 6.76   | ZEB1         |
| FOXN1.p2                          | -6.67  | FOXN1        |
| NFE2.p2                           | -6.64  | NFE2         |
| TFAP2B.p2                         | -6.64  | TFAP2B       |
| MZF1.p2                           | -6.49  | MZF1         |
| PAX4.p2                           | -6.36  | PAX4         |
| PATZ1.p2                          | 6.33   | PATZ1        |
| FOX{I1,J2}.p2                     | -6.13  | FOXI1,J2     |
| GATA1..3.p2                       | -6.01  | GATA1..3     |
| NFE2L2.p2                         | 5.99   | NFE2L2       |
| ETS1,2.p2                         | -5.92  | ETS1,2       |
| ZBTB16.p2                         | 5.64   | ZBTB16       |
| RBPJ.p2                           | -5.56  | RBPJ         |
| REST.p3                           | 5.55   | REST         |
| GATA6.p2                          | 5.45   | GATA6        |
| EP300.p2                          | -5.43  | EP300        |
| BACH2.p2                          | -5.43  | BACH2        |
| TFCP2.p2                          | -5.17  | TFCP2        |
| TAL1_TCF{3,4,12}.p2               | -4.99  | TAL1..       |
| FOXO1,3,4.p2                      | -4.98  | FOXO1,3,4    |
| HOX{A5,B5}.p2                     | 4.91   | HOXA5,B5     |

|                           |       |           |
|---------------------------|-------|-----------|
| STAT5{A,B}.p2             | -4.79 | STAT5A,B  |
| TLX1..3_NFIC{dimer}.p2    | -4.63 | TLX1..3.. |
| FOXL1.p2                  | -4.47 | FOXL1     |
| GLI1..3.p2                | -4.38 | GLI1..3   |
| ZNF384.p2                 | -4.35 | ZNF384    |
| SPI1.p2                   | -4.32 | SPI1      |
| POU5F1_SOX2{dimer}.p2     | 4.08  | POU5F1..  |
| RXRA_VDR{dimer}.p2        | 3.84  | RXRA..    |
| STAT2,4,6.p2              | -3.65 | STAT2,4,6 |
| ESR1.p2                   | 3.63  | ESR1      |
| HOX{A4,D4}.p2             | 3.60  | HOXA4,D4  |
| EOMES.p2                  | -3.51 | EOMES     |
| MAZ.p2                    | -3.20 | MAZ       |
| NANOG.p2                  | 3.19  | NANOG     |
| CTCF.p2                   | 3.10  | CTCF      |
| FEV.p2                    | 3.07  | FEV       |
| CEBPA,B_DDIT3.p2          | 3.04  | CEBPA,B.. |
| FOXQ1.p2                  | -3.02 | FOXQ1     |
| LMO2.p2                   | -2.78 | LMO2      |
| POU6F1.p2                 | 2.76  | POU6F1    |
| NKX2-3_NKX2-5.p2          | 2.74  | NKX2-3..  |
| CDX1,2,4.p2               | -2.70 | CDX1,2,4  |
| AR.p2                     | -2.65 | AR        |
| HIF1A.p2                  | 2.63  | HIF1A     |
| TGIF1.p2                  | -2.50 | TGIF1     |
| NANOG{mouse}.p2           | 2.43  | NANOGmo.. |
| GFI1.p2                   | 2.34  | GFI1      |
| NKX3-1.p2                 | -2.30 | NKX3-1    |
| LHX3,4.p2                 | 2.29  | LHX3,4    |
| ZFP161.p2                 | -2.22 | ZFP161    |
| NFIL3.p2                  | 2.18  | NFIL3     |
| ATF4.p2                   | 2.16  | ATF4      |
| ALX1.p2                   | -2.08 | ALX1      |
| IKZF1.p2                  | 2.03  | IKZF1     |
| TFAP2{A,C}.p2             | -1.91 | TFAP2A,C  |
| FOS_FOS{B,L1}_JUN{B,D}.p2 | -1.83 | FOS..     |
| PPARG.p2                  | -1.78 | PPARG     |
| VSX1,2.p2                 | -1.70 | VSX1,2    |
| NKX2-2,8.p2               | -1.64 | NKX2-2,8  |
| HOXA9_MEIS1.p2            | -1.58 | HOXA9..   |
| ZBTB6.p2                  | -1.47 | ZBTB6     |
| RREB1.p2                  | 1.46  | RREB1     |
| CUX2.p2                   | -1.46 | CUX2      |
| ONECUT1,2.p2              | -1.46 | ONECUT1,2 |
| SREBF1,2.p2               | -1.40 | SREBF1,2  |
| PDX1.p2                   | 1.34  | PDX1      |
| MTF1.p2                   | -1.25 | MTF1      |
| NKX2-1,4.p2               | -1.23 | NKX2-1,4  |
| DMAP1_NCOR{1,2}_SMARC.p2  | -1.20 | ..SMARC   |

|                         |       |           |
|-------------------------|-------|-----------|
| RFX1..5_RFXANK_RFXAP.p2 | -1.19 | RFX1..5.. |
| POU5F1.p2               | -1.18 | POU5F1    |
| PAX6.p2                 | -1.14 | PAX6      |
| ATF5_CREB3.p2           | -1.14 | ATF5..    |
| MAFB.p2                 | -1.13 | MAFB      |
| TBX4,5.p2               | 1.07  | TBX4,5    |
| RXRG_dimer.p3           | 1.07  | RXRG..    |
| CREB1.p2                | 1.06  | CREB1     |
| AIRE.p2                 | 1.03  | AIRE      |
| FOX{F1,F2,J1}.p2        | -0.99 | FOXF1,F.. |
| EVI1.p2                 | -0.97 | EVI1      |
| EHF.p2                  | -0.95 | EHF       |
| NFY{A,B,C}.p2           | 0.93  | NFYA,B,C  |
| GTF2A1,2.p2             | -0.93 | GTF2A1,2  |
| MYB.p2                  | -0.90 | MYB       |
| XBP1.p3                 | -0.90 | XBP1      |
| MYOD1.p2                | -0.89 | MYOD1     |
| HBP1_HMGB_SSRP1_UBTF.p2 | -0.87 | HBP1..    |
| ESRRA.p2                | 0.86  | ESRRA     |
| HMGA1,2.p2              | 0.86  | HMGA1,2   |
| JUN.p2                  | 0.86  | JUN       |
| ZNF423.p2               | -0.86 | ZNF423    |
| KLF12.p2                | 0.84  | KLF12     |
| ZNF148.p2               | 0.79  | ZNF148    |
| SRY.p2                  | -0.78 | SRY       |
| SOX2.p2                 | -0.77 | SOX2      |
| SRF.p3                  | 0.76  | SRF       |
| MSX1,2.p2               | -0.75 | MSX1,2    |
| RXR{A,B,G}.p2           | 0.72  | RXRA,B,G  |
| GFI1B.p2                | -0.72 | GFI1B     |
| FOX{C1,C2}.p2           | 0.71  | FOXC1,C2  |
| HNF1A.p2                | 0.71  | HNF1A     |
| MYBL2.p2                | 0.67  | MYBL2     |
| NR3C1.p2                | 0.64  | NR3C1     |
| ZNF238.p2               | 0.61  | ZNF238    |
| EBF1.p2                 | 0.58  | EBF1      |
| EN1,2.p2                | -0.54 | EN1,2     |
| NR6A1.p2                | -0.53 | NR6A1     |
| NKX6-1,2.p2             | 0.51  | NKX6-1,2  |
| PAX8.p2                 | 0.50  | PAX8      |
| NFIX.p2                 | -0.49 | NFIX      |
| NFE2L1.p2               | -0.48 | NFE2L1    |
| FOXP3.p2                | -0.47 | FOXP3     |
| EWSR1-FLI1.p2           | 0.45  | EWSR1-F.. |
| T.p2                    | -0.42 | T         |
| SPIB.p2                 | 0.41  | SPIB      |
| FOXA2.p3                | 0.40  | FOXA2     |
| NR5A1,2.p2              | 0.39  | NR5A1,2   |
| KLF4.p3                 | -0.38 | KLF4      |



|                       |       |           |
|-----------------------|-------|-----------|
| PAX3,7.p2             | 0.37  | PAX3,7    |
| PBX1.p2               | -0.36 | PBX1      |
| ATF2.p2               | -0.35 | ATF2      |
| SOX{8,9,10}.p2        | 0.35  | SOX8,9,10 |
| MYFfamily.p2          | 0.34  | MYFfamily |
| RORA.p2               | 0.33  | RORA      |
| ATF6.p2               | 0.33  | ATF6      |
| TBP.p2                | 0.33  | TBP       |
| ZIC1..3.p2            | 0.32  | ZIC1..3   |
| LEF1_TCF7_TCF7L1,2.p2 | -0.32 | LEF1..    |
| SOX17.p2              | -0.31 | SOX17     |
| MEF2{A,B,C,D}.p2      | 0.30  | MEF2A,B.. |
| ARID5B.p2             | 0.29  | ARID5B    |
| YY1.p2                | -0.29 | YY1       |
| GTF2I.p2              | -0.27 | GTF2I     |
| NHLH1,2.p2            | 0.25  | NHLH1,2   |
| POU2F1..3.p2          | -0.25 | POU2F1..3 |
| CDC5L.p2              | 0.25  | CDC5L     |
| TFAP4.p2              | -0.23 | TFAP4     |
| POU3F1..4.p2          | 0.22  | POU3F1..4 |
| EGR1..3.p2            | 0.22  | EGR1..3   |
| NFATC1..3.p2          | 0.22  | NFATC1..3 |
| HNF4A_NR2F1,2.p2      | -0.21 | HNF4A..   |
| SMAD1..7,9.p2         | -0.21 | SMAD1.... |
| CRX.p2                | -0.21 | CRX       |
| GZF1.p2               | -0.20 | GZF1      |
| NR1H4.p2              | -0.20 | NR1H4     |
| PRRX1,2.p2            | -0.19 | PRRX1,2   |
| HSF1,2.p2             | -0.18 | HSF1,2    |
| TLX2.p2               | 0.18  | TLX2      |
| HAND1,2.p2            | 0.16  | HAND1,2   |
| ELF1,2,4.p2           | 0.16  | ELF1,2,4  |
| TP53.p2               | 0.15  | TP53      |
| NKX3-2.p2             | -0.15 | NKX3-2    |
| POU1F1.p2             | -0.14 | POU1F1    |
| FOSL2.p2              | -0.14 | FOSL2     |
| IKZF2.p2              | 0.14  | IKZF2     |
| HLF.p2                | 0.14  | HLF       |
| DBP.p2                | -0.09 | DBP       |
| TCF4_dimer.p2         | 0.09  | TCF4..    |
| ADNP_IRX_SIX_ZHX.p2   | 0.08  | ADNP..    |
| STAT1,3.p3            | -0.08 | STAT1,3   |
| RUNX1..3.p2           | -0.08 | RUNX1..3  |
| BPTF.p2               | 0.04  | BPTF      |

**Table 5. Five experiments** combined MARA results **including only the miR AAGUGCU seed family** ranked by absolute activity z-values.

| name                              | zvalue | abbreviation |
|-----------------------------------|--------|--------------|
| AAGUGCU                           | -42.07 | miR-294      |
| AAAGUGC                           | -34.37 | miR-17-..    |
| IRF1,2,7.p3                       | -18.27 | IRF1,2,7     |
| bHLH_family.p2                    | 17.04  | bHLH..       |
| TFEB.p2                           | -13.34 | TFEB         |
| AAGGCAC                           | -13.22 | miR-124      |
| ARNT_ARNT2_BHLHB2_MAX_MYC_USF1.p2 | 12.86  | ARNT..       |
| PRDM1.p3                          | -12.50 | PRDM1        |
| HIC1.p2                           | -12.04 | HIC1         |
| NFKB1_REL_RELA.p2                 | -11.35 | NFKB1..      |
| UCAAGUA                           | -11.23 | miR-26a..    |
| CAGUGCA                           | -10.32 | miR-148..    |
| PAX5.p2                           | -10.26 | PAX5         |
| AGCACCA                           | 10.07  | miR-29a..    |
| HES1.p2                           | 9.49   | HES1         |
| TFDP1.p2                          | 9.43   | TFDP1        |
| SP1.p2                            | -9.37  | SP1          |
| AHR_ARNT_ARNT2.p2                 | 9.08   | AHR..        |
| GUGCAAA                           | -8.91  | miR-19a..    |
| SPZ1.p2                           | -8.60  | SPZ1         |
| ZNF143.p2                         | 8.57   | ZNF143       |
| ELK1,4_GABP{A,B1}.p3              | 8.50   | ELK1,4..     |
| NRF1.p2                           | 8.27   | NRF1         |
| FOXD3.p2                          | 8.21   | FOXD3        |
| HMX1.p2                           | 8.16   | HMX1         |
| FOX{D1,D2}.p2                     | -7.92  | FOXD1,D2     |
| GUAGUGU                           | -7.67  | miR-142..    |
| PITX1..3.p2                       | 7.48   | PITX1..3     |
| TEAD1.p2                          | -7.30  | TEAD1        |
| HOX{A6,A7,B6,B7}.p2               | -7.27  | HOXA6,A..    |
| SOX5.p2                           | 7.19   | SOX5         |
| GGAAGAC                           | 7.02   | miR-7a-7b    |
| AGUGCAA                           | -7.01  | miR-130..    |
| E2F1..5.p2                        | 6.98   | E2F1..5      |
| PAX2.p2                           | -6.63  | PAX2         |
| SNAI1..3.p2                       | -6.55  | SNAI1..3     |
| PATZ1.p2                          | 6.48   | PATZ1        |
| ZEB1.p2                           | 6.44   | ZEB1         |
| TFAP2B.p2                         | -6.40  | TFAP2B       |
| MZF1.p2                           | -6.35  | MZF1         |
| NFE2.p2                           | -6.32  | NFE2         |
| FOXN1.p2                          | -6.27  | FOXN1        |
| FOX{I1,J2}.p2                     | -6.24  | FOXI1,J2     |
| AGCAGCA                           | -6.10  | miR-15a..    |
| ETS1,2.p2                         | -5.99  | ETS1,2       |
| PAX4.p2                           | -5.98  | PAX4         |
| GATA1..3.p2                       | -5.88  | GATA1..3     |
| AGUGGUU                           | -5.78  | miR-140..    |

|                        |       |           |
|------------------------|-------|-----------|
| CUUUGGU                | -5.69 | miR-9     |
| NFE2L2.p2              | 5.50  | NFE2L2    |
| EP300.p2               | -5.47 | EP300     |
| FOXO1,3,4.p2           | -5.47 | FOXO1,3,4 |
| RBPJ.p2                | -5.45 | RBPJ      |
| ZBTB16.p2              | 5.43  | ZBTB16    |
| GGCUCAG                | 5.35  | miR-24    |
| BACH2.p2               | -5.29 | BACH2     |
| TAL1_TCF{3,4,12}.p2    | -5.14 | TAL1..    |
| GATA6.p2               | 5.14  | GATA6     |
| TFCP2.p2               | -5.04 | TFCP2     |
| AAGGUGC                | -5.02 | miR-18a.. |
| UGUGCUU                | 4.98  | miR-218   |
| AAUACUG                | -4.83 | miR-200.. |
| GAGGUAG                | 4.77  | let-7a..  |
| STAT5{A,B}.p2          | -4.66 | STAT5A,B  |
| FOXL1.p2               | -4.56 | FOXL1     |
| CACAGUG                | -4.49 | miR-128   |
| TGIF1.p2               | -4.42 | TGIF1     |
| TLX1..3_NFIC{dimer}.p2 | -4.39 | TLX1..3.. |
| ZNF384.p2              | -4.28 | ZNF384    |
| HOX{A5,B5}.p2          | 4.25  | HOXA5,B5  |
| GLI1..3.p2             | -4.17 | GLI1..3   |
| STAT2,4,6.p2           | -3.97 | STAT2,4,6 |
| UUGGCAC                | -3.97 | miR-96    |
| GUAAACA                | -3.82 | miR-30a.. |
| CCCUGAG                | -3.78 | miR-125.. |
| SPI1.p2                | -3.78 | SPI1      |
| POU5F1_SOX2{dimer}.p2  | 3.72  | POU5F1..  |
| AGCAGCG                | 3.61  | miR-503   |
| AUGGCAC                | -3.58 | miR-183   |
| GCAGCAU                | 3.55  | miR-103.. |
| RXRA_VDR{dimer}.p2     | 3.53  | RXRA..    |
| ESR1.p2                | 3.52  | ESR1      |
| MAZ.p2                 | -3.33 | MAZ       |
| HOX{A4,D4}.p2          | 3.31  | HOXA4,D4  |
| EOMES.p2               | -3.25 | EOMES     |
| UCCCUUU                | 3.24  | miR-204.. |
| ACAGUAC                | -3.21 | miR-101.. |
| FEV.p2                 | 3.20  | FEV       |
| AGCUGCC                | 3.14  | miR-22    |
| HIF1A.p2               | 3.07  | HIF1A     |
| NANOG.p2               | 3.06  | NANOG     |
| CTCF.p2                | 2.98  | CTCF      |
| GCUGGUG                | 2.87  | miR-138   |
| NKX2-3_NKX2-5.p2       | 2.85  | NKX2-3..  |
| LMO2.p2                | -2.85 | LMO2      |
| GUCAGUU                | -2.84 | miR-223   |
| FOXQ1.p2               | -2.83 | FOXQ1     |

|                           |       |           |
|---------------------------|-------|-----------|
| CDX1,2,4.p2               | -2.81 | CDX1,2,4  |
| AGCUUAU                   | -2.77 | miR-21-.. |
| POU6F1.p2                 | 2.77  | POU6F1    |
| AACACUG                   | -2.76 | miR-141.. |
| REST.p3                   | 2.67  | REST      |
| CCAGUGU                   | -2.67 | miR-199.. |
| GFI1.p2                   | 2.58  | GFI1      |
| CCUUCAU                   | -2.49 | miR-205   |
| GGAAUGU                   | -2.49 | miR-1a-.. |
| CEBPA,B_DDIT3.p2          | 2.45  | CEBPA,B.. |
| ACCCUGU                   | 2.36  | miR-10a.. |
| AR.p2                     | -2.31 | AR        |
| UCCAGUU                   | -2.30 | miR-145   |
| ATF4.p2                   | 2.28  | ATF4      |
| NKX3-1.p2                 | -2.22 | NKX3-1    |
| CCAGCAU                   | 2.21  | miR-338.. |
| UGCAUAG                   | 2.13  | miR-153   |
| NFIL3.p2                  | 2.13  | NFIL3     |
| AUGGCUU                   | 2.12  | miR-135.. |
| IKZF1.p2                  | 2.12  | IKZF1     |
| UCACAUU                   | 2.11  | miR-23a.. |
| LHX3,4.p2                 | 2.05  | LHX3,4    |
| FOS_FOS{B,L1}_JUN{B,D}.p2 | -2.05 | FOS..     |
| ALX1.p2                   | -2.02 | ALX1      |
| NANOG{mouse}.p2           | 1.92  | NANOGmo.. |
| GUAACAG                   | -1.87 | miR-194   |
| CUCCCAA                   | 1.86  | miR-150.. |
| ZFP161.p2                 | -1.86 | ZFP161    |
| UAAGACU                   | -1.84 | miR-499   |
| UAAGACG                   | -1.83 | miR-208.. |
| TFAP2{A,C}.p2             | -1.76 | TFAP2A,C  |
| GAUCAGA                   | -1.75 | miR-383   |
| PPARG.p2                  | -1.75 | PPARG     |
| GCUACAU                   | -1.67 | miR-221.. |
| SRY.p2                    | -1.65 | SRY       |
| RREB1.p2                  | 1.63  | RREB1     |
| SREBF1,2.p2               | -1.59 | SREBF1,2  |
| ONECUT1,2.p2              | -1.58 | ONECUT1,2 |
| UAAUGCU                   | -1.56 | miR-155   |
| AAUCUCU                   | 1.55  | miR-216b  |
| NKX2-2,8.p2               | -1.53 | NKX2-2,8  |
| GGCAAGA                   | -1.50 | miR-31    |
| VSX1,2.p2                 | -1.46 | VSX1,2    |
| HOXA9_MEIS1.p2            | -1.41 | HOXA9..   |
| RFX1..5_RFXANK_RFXAP.p2   | -1.38 | RFX1..5.. |
| DMAP1_NCOR{1,2}_SMARC.p2  | -1.34 | ..SMARC   |
| UGACCUA                   | 1.28  | miR-192.. |
| CUX2.p2                   | -1.28 | CUX2      |
| CUACAGU                   | -1.27 | miR-139.. |

|                         |       |           |
|-------------------------|-------|-----------|
| POU5F1.p2               | -1.24 | POU5F1    |
| ZBTB6.p2                | -1.22 | ZBTB6     |
| AGGUAGU                 | 1.17  | miR-196.. |
| AAUGCCC                 | -1.15 | miR-365   |
| MAFB.p2                 | -1.14 | MAFB      |
| AACGGAA                 | 1.13  | miR-191   |
| UGAAAUG                 | -1.12 | miR-203   |
| PDX1.p2                 | 1.09  | PDX1      |
| NKX2-1,4.p2             | -1.08 | NKX2-1,4  |
| ATF5_CREB3.p2           | -1.08 | ATF5..    |
| UUUUUGC                 | 1.06  | miR-129.. |
| AACAGUC                 | -1.05 | miR-132.. |
| PAX6.p2                 | -1.03 | PAX6      |
| EVI1.p2                 | -1.01 | EVI1      |
| AIRE.p2                 | 1.01  | AIRE      |
| CREB1.p2                | 1.01  | CREB1     |
| AAUCUCA                 | 0.97  | miR-216a  |
| HMGA1,2.p2              | 0.96  | HMGA1,2   |
| AUGACAC                 | 0.95  | miR-425.. |
| EHF.p2                  | -0.93 | EHF       |
| NFY{A,B,C}.p2           | 0.92  | NFYA,B,C  |
| FOX{F1,F2,J1}.p2        | -0.92 | FOXF1,F.. |
| RXRG_dimer.p3           | 0.89  | RXRG..    |
| MYB.p2                  | -0.89 | MYB       |
| GTF2A1,2.p2             | -0.89 | GTF2A1,2  |
| ESRRA.p2                | 0.88  | ESRRA     |
| CAGCAGG                 | 0.88  | miR-214.. |
| JUN.p2                  | 0.88  | JUN       |
| ACAUUCA                 | -0.87 | miR-181.. |
| CGUACCG                 | 0.86  | miR-126.. |
| TBX4,5.p2               | 0.86  | TBX4,5    |
| XBP1.p3                 | -0.85 | XBP1      |
| KLF12.p2                | 0.83  | KLF12     |
| FOX{C1,C2}.p2           | 0.83  | FOXC1,C2  |
| AUUGCAC                 | -0.82 | miR-25..  |
| SPIB.p2                 | 0.82  | SPIB      |
| GGAGUGU                 | 0.82  | miR-122   |
| MYOD1.p2                | -0.79 | MYOD1     |
| RXR{A,B,G}.p2           | 0.78  | RXRA,B,G  |
| AACCUGG                 | -0.78 | miR-490.. |
| SRF.p3                  | 0.78  | SRF       |
| UCACAGU                 | 0.77  | miR-27a.. |
| UUGGUCC                 | 0.77  | miR-133.. |
| UGUGCGU                 | 0.73  | miR-210   |
| MYBL2.p2                | 0.72  | MYBL2     |
| HBP1_HMGB_SSRP1_UBTF.p2 | -0.72 | HBP1..    |
| GAGAACU                 | -0.72 | miR-146.. |
| MSX1,2.p2               | -0.71 | MSX1,2    |
| ZNF423.p2               | -0.70 | ZNF423    |

|                       |       |           |
|-----------------------|-------|-----------|
| ZNF148.p2             | 0.69  | ZNF148    |
| SOX2.p2               | -0.68 | SOX2      |
| HNF1A.p2              | 0.68  | HNF1A     |
| GFI1B.p2              | -0.66 | GFI1B     |
| CRX.p2                | -0.61 | CRX       |
| MTF1.p2               | -0.60 | MTF1      |
| NFE2L1.p2             | -0.60 | NFE2L1    |
| FOXP3.p2              | -0.58 | FOXP3     |
| NR3C1.p2              | 0.58  | NR3C1     |
| UUGUUCG               | -0.57 | miR-375   |
| EN1,2.p2              | -0.55 | EN1,2     |
| NKX6-1,2.p2           | 0.55  | NKX6-1,2  |
| ZNF238.p2             | 0.53  | ZNF238    |
| PAX8.p2               | 0.52  | PAX8      |
| ACUGCAU               | -0.49 | miR-217   |
| EWSR1-FLI1.p2         | 0.47  | EWSR1-F.. |
| NR6A1.p2              | -0.45 | NR6A1     |
| UGCAUUG               | 0.44  | miR-33    |
| FOXA2.p3              | 0.43  | FOXA2     |
| NFIX.p2               | -0.41 | NFIX      |
| UUGGCAA               | 0.40  | miR-182   |
| PBX1.p2               | -0.39 | PBX1      |
| EBF1.p2               | 0.38  | EBF1      |
| SMAD1..7,9.p2         | -0.37 | SMAD1.... |
| T.p2                  | -0.35 | T         |
| ARID5B.p2             | 0.32  | ARID5B    |
| PAX3,7.p2             | 0.32  | PAX3,7    |
| TBP.p2                | 0.32  | TBP       |
| TP53.p2               | 0.31  | TP53      |
| ACUGGCC               | 0.31  | miR-193.. |
| MYFfamily.p2          | 0.31  | MYFfamily |
| NR5A1,2.p2            | 0.30  | NR5A1,2   |
| MEF2{A,B,C,D}.p2      | 0.29  | MEF2A,B.. |
| GAGAUGA               | 0.29  | miR-143   |
| GAUUGUC               | -0.27 | miR-219.. |
| ATF6.p2               | 0.27  | ATF6      |
| ZIC1..3.p2            | 0.27  | ZIC1..3   |
| GZF1.p2               | -0.26 | GZF1      |
| NFATC1..3.p2          | 0.26  | NFATC1..3 |
| LEF1_TCF7_TCF7L1,2.p2 | -0.26 | LEF1..    |
| YY1.p2                | -0.26 | YY1       |
| POU3F1..4.p2          | 0.26  | POU3F1..4 |
| HNF4A_NR2F1,2.p2      | -0.25 | HNF4A..   |
| EGR1..3.p2            | 0.24  | EGR1..3   |
| KLF4.p3               | -0.24 | KLF4      |
| SOX17.p2              | -0.24 | SOX17     |
| SOX{8,9,10}.p2        | 0.23  | SOX8,9,10 |
| FOSL2.p2              | -0.23 | FOSL2     |
| NHLH1,2.p2            | 0.22  | NHLH1,2   |

|                     |       |           |
|---------------------|-------|-----------|
| TLX2.p2             | 0.22  | TLX2      |
| IKZF2.p2            | 0.21  | IKZF2     |
| TFAP4.p2            | -0.21 | TFAP4     |
| ATF2.p2             | -0.20 | ATF2      |
| NR1H4.p2            | -0.20 | NR1H4     |
| HSF1,2.p2           | -0.19 | HSF1,2    |
| UAUUGCU             | -0.18 | miR-137   |
| RUNX1..3.p2         | -0.17 | RUNX1..3  |
| TCF4_dimer.p2       | 0.17  | TCF4..    |
| AACCGUU             | 0.17  | miR-451   |
| POU2F1..3.p2        | -0.17 | POU2F1..3 |
| CDC5L.p2            | 0.17  | CDC5L     |
| DBP.p2              | -0.16 | DBP       |
| POU1F1.p2           | -0.15 | POU1F1    |
| CGUGUCU             | 0.14  | miR-187   |
| HLF.p2              | 0.13  | HLF       |
| ADNP_IRX_SIX_ZHX.p2 | 0.12  | ADNP..    |
| NKX3-2.p2           | -0.11 | NKX3-2    |
| STAT1,3.p3          | 0.11  | STAT1,3   |
| ELF1,2,4.p2         | 0.11  | ELF1,2,4  |
| GGACGGA             | -0.10 | miR-184   |
| PRRX1,2.p2          | 0.09  | PRRX1,2   |
| BPTF.p2             | 0.04  | BPTF      |
| GTF2I.p2            | 0.04  | GTF2I     |
| GAUAUGU             | -0.03 | miR-190.. |
| GGCAGUG             | -0.03 | miR-34a.. |
| HAND1,2.p2          | 0.02  | HAND1,2   |
| RORA.p2             | -0.01 | RORA      |
| ACAGUAU             | -0.00 | miR-144   |
| ACCCGUA             | -0.00 | miR-99a.. |

**Table 6. Five experiments** combined MARA results **including all miRNA seed families** ranked by absolute activity z-values.

| motif abbreviation | motif name                | motif binding genes                                    |
|--------------------|---------------------------|--------------------------------------------------------|
| TEAD1              | TEAD1.p2                  | Tead2, Tead1, Tead4, Tead3                             |
| EOMES              | EOMES.p2                  | Eomes                                                  |
| KLF4               | KLF4.p3                   | Klf4                                                   |
| POU5F1..           | POU5F1_SOX2{dimer}.p2     | Sox2, Pou5f1                                           |
| ADNP..             | ADNP_IRX_SIX_ZHX.p2       | Zhx3, Adnp, Zhx1, Irx4, Zhx2, Six2, Irx5, Six5         |
| HOXA4,D4           | HOX{A4,D4}.p2             | Hoxd4, Hoxa4                                           |
| BACH2              | BACH2.p2                  | Bach2                                                  |
| POU3F1..4          | POU3F1..4.p2              | Pou3f4, Pou3f2, Pou3f3, Pou3f1                         |
| ZNF143             | ZNF143.p2                 | Zfp143                                                 |
| MYFfamily          | MYFfamily.p2              | Myog, Myf5, Myf6, Myod1                                |
| NFE2               | NFE2.p2                   | Nfe2                                                   |
| T                  | T.p2                      | T                                                      |
| NKX3-1             | NKX3-1.p2                 | Nkx3-1                                                 |
| FOXA2              | FOXA2.p3                  | Foxa2                                                  |
| CEBPA,B..          | CEBPA,B_DDIT3.p2          | Cebpb, Ddit3, Cebpa                                    |
| EHF                | EHF.p2                    | Ehf                                                    |
| HNF4A..            | HNF4A_NR2F1,2.p2          | Hnf4a, Nr2f1, Nr2f2                                    |
| CRX                | CRX.p2                    | Crx                                                    |
| TFDP1              | TFDP1.p2                  | Tfdp1                                                  |
| GFI1B              | GFI1B.p2                  | Gfi1b                                                  |
| STAT1,3            | STAT1,3.p3                | Stat3, Stat1                                           |
| NKX3-2             | NKX3-2.p2                 | Nkx3-2                                                 |
| STAT2,4,6          | STAT2,4,6.p2              | Stat4, Stat2, Stat6                                    |
| RBPJ               | RBPJ.p2                   | Rbpj                                                   |
| RREB1              | RREB1.p2                  | Rreb1                                                  |
| FOS..              | FOS_FOS{B,L1}_JUN{B,D}.p2 | Junb, Fosl1, Fos, Fosb, Jund                           |
| SREBF1,2           | SREBF1,2.p2               | Srebf2, Srebf1                                         |
| FOXL1              | FOXL1.p2                  | Foxl1                                                  |
| HSF1,2             | HSF1,2.p2                 | Hsf2, Hsf1                                             |
| ARID5B             | ARID5B.p2                 | Arid5b                                                 |
| GTF2I              | GTF2I.p2                  | Gtf2i                                                  |
| ESRRA              | ESRRA.p2                  | Esrra                                                  |
| ONECUT1,2          | ONECUT1,2.p2              | Onecut1, Onecut2                                       |
| NKX2-3..           | NKX2-3_NKX2-5.p2          | Nkx2-5, Nkx2-3                                         |
| GATA6              | GATA6.p2                  | Gata6                                                  |
| ZBTB16             | ZBTB16.p2                 | Zbtb16                                                 |
| AIRE               | AIRE.p2                   | Aire                                                   |
| SMAD1....          | SMAD1..7,9.p2             | Smad4, Smad5, Smad9, Smad7, Smad6, Smad2, Smad3, Smad1 |
| BPTF               | BPTF.p2                   | Bptf                                                   |
| CDC5L              | CDC5L.p2                  | Cdc5l                                                  |



|           |                      |                           |
|-----------|----------------------|---------------------------|
| NKX6-1,2  | NKX6-1,2.p2          | Nkx6-2, Nkx6-1            |
| NANOG     | NANOG.p2             | Nanog                     |
| PAX4      | PAX4.p2              | Pax4                      |
| NFYA,B,C  | NFY{A,B,C}.p2        | NfyA, Nfyb, Nfyc          |
| EP300     | EP300.p2             | Ep300                     |
| TAL1..    | TAL1.TCF{3,4,12}.p2  | Tcf4, Tcf12, Tcf3, Tal1   |
| GZF1      | GZF1.p2              | Gzf1                      |
| ATF4      | ATF4.p2              | Atf4                      |
| PAX3,7    | PAX3,7.p2            | Pax7, Pax3                |
| NKX2-2,8  | NKX2-2,8.p2          | Nkx2-2, Nkx2-9            |
| AHR..     | AHR_ARNT_ARNT2.p2    | Ahr, Arnt, Arnt2          |
| NFE2L1    | NFE2L1.p2            | Nfe2l1                    |
| MYB       | MYB.p2               | Myb                       |
| NFIX      | NFIX.p2              | Nfix                      |
| ELK1,4..  | ELK1,4_GABP{A,B1}.p3 | Elk1, Gabpa, Gabpb1, Elk4 |
| KLF12     | KLF12.p2             | Klf12                     |
| SPZ1      | SPZ1.p2              | Spz1                      |
| GFI1      | GFI1.p2              | Gfi1                      |
| MAZ       | MAZ.p2               | Maz                       |
| PRDM1     | PRDM1.p3             | Prdm1                     |
| PAX8      | PAX8.p2              | Pax8                      |
| HIC1      | HIC1.p2              | Hic1                      |
| FOSL2     | FOSL2.p2             | Fosl2                     |
| EWSR1-F.. | EWSR1-FLI1.p2        | Fli1, Ewsr1               |
| TP53      | TP53.p2              | Trp53                     |
| FOXN1     | FOXN1.p2             | Foxn1                     |
| JUN       | JUN.p2               | Junb, Jun, Jund           |
| AR        | AR.p2                | Ar                        |
| ZNF423    | ZNF423.p2            | Zfp423                    |
| FOXC1,C2  | FOX{C1,C2}.p2        | Foxc1, Foxc2              |
| VSX1,2    | VSX1,2.p2            | Vsx1, Vsx2                |
| MZF1      | MZF1.p2              | Mzf1                      |
| SP1       | SP1.p2               | Sp1                       |
| ELF1,2,4  | ELF1,2,4.p2          | Elf4, Elf1, Elf2          |
| SOX5      | SOX5.p2              | Sox5                      |
| XBP1      | XBP1.p3              | Xbp1                      |
| REST      | REST.p3              | Rest                      |
| TFAP4     | TFAP4.p2             | Tcfap4                    |
| ETS1,2    | ETS1,2.p2            | Ets2, Ets1                |
| NR3C1     | NR3C1.p2             | Nr3c1                     |
| HMGA1,2   | HMGA1,2.p2           | Hmga1, Hmga2              |
| EN1,2     | EN1,2.p2             | En2, En1                  |
| ALX1      | ALX1.p2              | Alx1                      |
| ZNF384    | ZNF384.p2            | Zfp384                    |
| HOXA5,B5  | HOX{A5,B5}.p2        | Hoxa5, Hoxb5              |
| IKZF1     | IKZF1.p2             | Ikzf1                     |
| TCF4..    | TCF4.dimer.p2        | Tcf4                      |
| CUX2      | CUX2.p2              | Cux2                      |

|                                                                                                                                                                                                           |                                                                                                                                                                                                                                                                                       |                                                                                                                                                                                                                                                                                                     |
|-----------------------------------------------------------------------------------------------------------------------------------------------------------------------------------------------------------|---------------------------------------------------------------------------------------------------------------------------------------------------------------------------------------------------------------------------------------------------------------------------------------|-----------------------------------------------------------------------------------------------------------------------------------------------------------------------------------------------------------------------------------------------------------------------------------------------------|
| IRF1,2,7<br>HBP1..                                                                                                                                                                                        | IRF1,2,7.p3<br>HBP1_HMGB_SSRP1_UBTF.p2                                                                                                                                                                                                                                                | Irf2, Irf1, Irf7<br>Ssrp1, Hmgb3, Hmgb2,<br>Hbp1, Ubtf                                                                                                                                                                                                                                              |
| TLX2<br>SRF<br>HMX1<br>MEF2A,B..                                                                                                                                                                          | TLX2.p2<br>SRF.p3<br>HMX1.p2<br>MEF2{A,B,C,D}.p2                                                                                                                                                                                                                                      | Tlx2<br>Srf<br>Hmx1<br>Mef2a, Mef2c, Mef2d,<br>Mef2b                                                                                                                                                                                                                                                |
| GLI1..3<br>NKX2-1,4<br>FOXQ1<br>TBP<br>TLX1..3..<br>PBX1<br>EGR1..3<br>PDX1<br>ESR1<br>LHX3,4<br>ZNF148<br>HLF<br>FOXI1,J2<br>SPIB<br>FEV<br>NFIL3<br>NFE2L2<br>MAFB<br>ATF2<br>HOXA6,A..                 | GLI1..3.p2<br>NKX2-1,4.p2<br>FOXQ1.p2<br>TBP.p2<br>TLX1..3_NFIC{dimer}.p2<br>PBX1.p2<br>EGR1..3.p2<br>PDX1.p2<br>ESR1.p2<br>LHX3,4.p2<br>ZNF148.p2<br>HLF.p2<br>FOX{I1,J2}.p2<br>SPIB.p2<br>FEV.p2<br>NFIL3.p2<br>NFE2L2.p2<br>MAFB.p2<br>ATF2.p2<br>HOX{A6,A7,B6,B7}.p2              | Gli2, Gli1, Gli3<br>Nkx2-4, Nkx2-1<br>Foxq1<br>Tbp<br>Tlx1, Tlx3<br>Pbx1<br>Egr1, Egr2, Egr3<br>Pdx1<br>Esr1<br>Lhx4, Lhx3<br>Zfp148<br>Hlf<br>Foxi1, Foxj2<br>Spib<br>Fev<br>Nfil3<br>Nfe2l2<br>Mafb<br>Atf2<br>Hoxb6, Hoxb7, Hoxa6,<br>Hoxa7                                                      |
| GTF2A1,2<br>TFEB<br>SRY<br>TGIF1<br>RORA<br>SNAI1..3<br>HNF1A<br>RXRA,B,G<br>TFCP2<br>IKZF2<br>NR1H4<br>ZIC1..3<br>SPI1<br>POU1F1<br>NR5A1,2<br>NFKB1..<br>CDX1,2,4<br>FOXF1,F..<br>TFAP2A,C<br>NFATC1..3 | GTF2A1,2.p2<br>TFEB.p2<br>SRY.p2<br>TGIF1.p2<br>RORA.p2<br>SNAI1..3.p2<br>HNF1A.p2<br>RXR{A,B,G}.p2<br>TFCP2.p2<br>IKZF2.p2<br>NR1H4.p2<br>ZIC1..3.p2<br>SPI1.p2<br>POU1F1.p2<br>NR5A1,2.p2<br>NFKB1_REL_REL.A.p2<br>CDX1,2,4.p2<br>FOX{F1,F2,J1}.p2<br>TFAP2{A,C}.p2<br>NFATC1..3.p2 | Gtf2a1, Gtf2a2<br>Tcfef<br>Sry<br>Tgif1<br>Rora<br>Snai2, Snai3, Snai1<br>Hnf1a<br>Rxrb, Rxrg, Rxra<br>Tcfcp2<br>Ikzf2<br>Nr1h4<br>Zic3, Zic2, Zic1<br>Sfp1<br>Pou1f1<br>Nr5a2, Nr5a1<br>Rel, Rela, Nfkb1<br>Cdx1, Cdx2, Cdx4<br>Foxj1, Foxf1a, Foxf2<br>Tcfap2a, Tcfap2c<br>Nfatc2, Nfatc1, Nfatc3 |

|           |                                   |                                                                                                                                  |
|-----------|-----------------------------------|----------------------------------------------------------------------------------------------------------------------------------|
| ZFP161    | ZFP161.p2                         | Zfp161                                                                                                                           |
| ATF6      | ATF6.p2                           | Atf6                                                                                                                             |
| MYOD1     | MYOD1.p2                          | Myod1                                                                                                                            |
| ARNT..    | ARNT_ARNT2_BHLHB2_MAX_MYC_USF1.p2 | Myc, Bhlhe40, Arnt,<br>Arnt2, Usf1, Max                                                                                          |
| STAT5A,B  | STAT5{A,B}.p2                     | Stat5a, Stat5b                                                                                                                   |
| FOXD1,D2  | FOX{D1,D2}.p2                     | Foxd1, Foxd2                                                                                                                     |
| POU2F1..3 | POU2F1..3.p2                      | Pou2f2, Pou2f1, Pou2f3                                                                                                           |
| HES1      | HES1.p2                           | Hes1                                                                                                                             |
| EVI1      | EVI1.p2                           | Mecom                                                                                                                            |
| PRRX1,2   | PRRX1,2.p2                        | Prrx2, Prrx1                                                                                                                     |
| FOXD3     | FOXD3.p2                          | Foxd3                                                                                                                            |
| RXRA..    | RXRA_VDR{dimer}.p2                | Vdr                                                                                                                              |
| ZBTB6     | ZBTB6.p2                          | Zbtb6                                                                                                                            |
| RUNX1..3  | RUNX1..3.p2                       | Runx1, Runx2, Runx3                                                                                                              |
| ZNF238    | ZNF238.p2                         | Zfp238                                                                                                                           |
| PATZ1     | PATZ1.p2                          | Patz1                                                                                                                            |
| LMO2      | LMO2.p2                           | Lmo2                                                                                                                             |
| DBP       | DBP.p2                            | Dbp                                                                                                                              |
| CTCF      | CTCF.p2                           | Ctcf                                                                                                                             |
| PAX6      | PAX6.p2                           | Pax6                                                                                                                             |
| PAX5      | PAX5.p2                           | Pax5                                                                                                                             |
| PPARG     | PPARG.p2                          | Pparg                                                                                                                            |
| PAX2      | PAX2.p2                           | Pax2                                                                                                                             |
| CREB1     | CREB1.p2                          | Creb1                                                                                                                            |
| NRF1      | NRF1.p2                           | Nrf1                                                                                                                             |
| ZEB1      | ZEB1.p2                           | Zeb1                                                                                                                             |
| YY1       | YY1.p2                            | Yy1                                                                                                                              |
| NHLH1,2   | NHLH1,2.p2                        | Nhlh1, Nhlh2                                                                                                                     |
| SOX17     | SOX17.p2                          | Sox17                                                                                                                            |
| TBX4,5    | TBX4,5.p2                         | Tbx5, Tbx4                                                                                                                       |
| ..SMARC   | DMAP1_NCOR{1,2}_SMARC.p2          | Ncor2, Ncor1, Smarca1,<br>Smarca5, Smarcc2,<br>Dmap1                                                                             |
| MYBL2     | MYBL2.p2                          | Mybl2                                                                                                                            |
| RXRG..    | RXRG_dimer.p3                     | Pparg, Rxrb, Rxrg,<br>Ppara, Rxra, Nr1h2                                                                                         |
| PITX1..3  | PITX1..3.p2                       | Pitx3, Pitx2, Pitx1                                                                                                              |
| HOXA9..   | HOXA9_MEIS1.p2                    | Meis1, Hoxa9                                                                                                                     |
| ATF5..    | ATF5_CREB3.p2                     | Atf5, Creb3                                                                                                                      |
| SOX8,9,10 | SOX{8,9,10}.p2                    | Sox8, Sox9, Sox10                                                                                                                |
| POU6F1    | POU6F1.p2                         | Pou6f1                                                                                                                           |
| POU5F1    | POU5F1.p2                         | Pou5f1                                                                                                                           |
| MSX1,2    | MSX1,2.p2                         | Msx2, Msx1                                                                                                                       |
| bHLH..    | bHLH_family.p2                    | Hey2, Hey1, Olig2, Heyl,<br>Id1, Mxi1, Mitf, Clock,<br>Tcfe3, Mnt, Arntl, Mlx-<br>ipl, Olig1, Mxd4, Arntl2,<br>Npas2, Mxd3, Hes6 |

|           |                         |                                                |
|-----------|-------------------------|------------------------------------------------|
| GATA1..3  | GATA1..3.p2             | Gata3, Gata1, Gata2                            |
| TFAP2B    | TFAP2B.p2               | Tcfap2b                                        |
| EBF1      | EBF1.p2                 | Ebf1                                           |
| MTF1      | MTF1.p2                 | Mtf1                                           |
| FOXO1,3,4 | FOXO1,3,4.p2            | Foxo4, Foxo1, Foxo3                            |
| E2F1..5   | E2F1..5.p2              | E2f2, E2f5, E2f3, E2f4,<br>E2f1                |
| LEF1..    | LEF1.TCF7.TCF7L1,2.p2   | Lef1, Tcf7l2, Tcf7l1, Tcf7                     |
| HIF1A     | HIF1A.p2                | Hif1a                                          |
| RFX1..5.. | RFX1..5.RFXANK.RFXAP.p2 | Rfx3, Rfxank, Rfx1, Rfx2,<br>Rfxap, Rfx4, Rfx5 |
| SOX2      | SOX2.p2                 | Sox2                                           |
| NANOGmo.. | NANOG{mouse}.p2         | Nanog                                          |
| NR6A1     | NR6A1.p2                | Nr6a1                                          |
| FOXP3     | FOXP3.p2                | Foxp3                                          |
| HAND1,2   | HAND1,2.p2              | Hand2, Hand1                                   |

**Table 7. Motif information table** - Motif name, motif name abbreviation and transcription factor(s) binding the motif.

| Name  | Motif          | Abbr     | zvalue |
|-------|----------------|----------|--------|
| Irf2  | IRF1,2,7.p3    | IRF1,2,7 | -17.49 |
| Mxd3  | bHLH_family.p2 | bHLH..   | 16.54  |
| Clock | bHLH_family.p2 | bHLH..   | 16.54  |
| E2f5  | E2F1..5.p2     | E2F1..5  | 6.98   |

**Table 8. AAGUGCU seed family transcription factor targets as predicted by combined MARA** - Transcription factors consistently predicted (within all five experiments) by MARA to be a direct target of miR-294 and whose absolute motif activity z-value is  $> 5$  (due to the presence of AAGUGCU seed family miRNAs).

| Gene    | Orientation | Cloning Primers                             |
|---------|-------------|---------------------------------------------|
| Arnt2   | Forward     | GAATTCCTCGAGCCACTGGCAACCAAGCACA             |
| Arnt2   | Reverse     | CAGGACATAAGCGGCCCGCCTCAAGTTGATCAATTACCAA    |
| E2f5    | Forward     | GAATTGCTCGAGATAATGAAGGAGTTTGTGATCTGTT       |
| E2f5    | Reverse     | AGGACATATGCGGCCGCTCAGTTGTAATACAGAGATAGTGCAT |
| Foxj2   | Forward     | GATGTAGCTCGAGATTTCGAGAGAGGGAAATCTCACTT      |
| Foxj2   | Reverse     | GAGTGAAATGCGGCCGCGGAAACCAAAGGGAAGCTGT       |
| Irf2    | Forward     | GTATCTCTCGAGCCCGTGTCAAGAGCTGTAA             |
| Irf2    | Reverse     | CAGGAGAAATGCGGCCGCCATGATTACGCTCTAAGTAGACACA |
| Mxd3    | Forward     | GAATTCCTCGAGCGGGAGCACAGCTACTCA              |
| Mxd3    | Reverse     | CAGGACATAAGCGGCCCGCAGTGCGCAGGTGATAGACTGTA   |
| Smarcc2 | Forward     | GAATTCCTCGAGCTCAGCCTGAAGAGTTCATCACTA        |
| Smarcc2 | Reverse     | GACCAGAAAGCGGCCCGCCTGCCTAGCAGCCACAGCTAA     |
| Zfp238  | Forward     | CAAACCTCTCGAGGTACGGTCTAAAAGCAGTCTTGTT       |
| Zfp238  | Reverse     | TAAACTGCGGCCGCCAAATCTGTTGTGCGACTAT          |

**Table 9.** Primers used for cloning

| Gene    | Orientation | Mutagenesis Primers                              |
|---------|-------------|--------------------------------------------------|
| Arnt2   | Forward     | GGCTTCCAAGAACAGCAAACCTCGTCTCTCTCTTAGCC           |
| Arnt2   | Reverse     | GGCTAAGAGAGAGACGAGTTTGCTGTTCTTGGAAGCC            |
| E2f5    | Forward     | GTGAAGTGCCTTCTGTTTTAGAAAGCCTATCAGTTTGTTGAC       |
| E2f5    | Reverse     | GTCAACAAACTGATAGGCTTCTAAAACAGAAGGCACTTCAC        |
| Foxj2   | Forward     | GCAGTTCACTAAAGAGTTATTTCTTTGTAAGG                 |
| Foxj2   | Reverse     | CCTTACAAAGAAATAACTCTTTAGTGAAGTGC                 |
| Irf2    | Forward     | GCACCTTATCTTGAAGTACAATAGGCCTTCTTG                |
| Irf2    | Reverse     | CAAGAAGGCCTATTGTACTTCAAGATAAGGTGC                |
| Mxd3    | Forward     | GGAATTTTCATGTAGCGGCCCTGCTTTGCTGC                 |
| Mxd3    | Reverse     | GCAGCAAAGCAGGGCCGCTACATGAAATTCC                  |
| Smarcc2 | Forward     | CCTCAAGTTTGAAAAGCAGCACCTACTTTTGACAG              |
| Smarcc2 | Reverse     | CTGTCAAAGTAGGTGCTGCTTTTCAAAGTGGAG                |
| Zfp238  | Forward     | GTTGGGATCTTAAGTGTGTTTTGTAGAATAATAGCATGAGAATCTCAC |
| Zfp238  | Reverse     | GTGAGATTCTCATGCTATTATTCTACAAAAACAAGTTAAGATCCCAAC |

**Table 10.** Primers used for mutagenesis.

## References

1. Hanina, S. A. *et al.* Genome-wide identification of targets and function of individual MicroRNAs in mouse embryonic stem cells. *PLoS Genetics* **6**, e1001163 (2010).
2. Melton, C., Judson, R. L. & Blelloch, R. Opposing microRNA families regulate self-renewal in mouse embryonic stem cells. *Nature* **463**, 621–6 (2010).
3. Sinkkonen, L. *et al.* MicroRNAs control de novo DNA methylation through regulation of transcriptional repressors in mouse embryonic stem cells. *Nat Struct Mol Biol* **15**, 259–67 ST – MicroRNAs control de novo DNA methyla (2008).
4. Zheng, G. X. *et al.* A latent pro-survival function for the mir-290-295 cluster in mouse embryonic stem cells. *PLoS Genet* **7**, e1002054 ST – A latent pro-survival function for (2011).
5. Barrett, T. *et al.* NCBI GEO: archive for high-throughput functional genomic data. *Nucleic Acids Research* **37**, D885–90 (2009).
6. Jay, F. & Ciaudo, C. An RNA tool kit to study the status of mouse ES cells: sex determination and stemness. *Methods (San Diego, Calif.)* **63**, 85–92 (2013).
